# Supplementary material for: Synthesis of an amino-functionalized metal–organic framework at a nanoscale level for gold nanoparticle deposition and catalysis
Source: Royal Society of Chemistry journal article supplement (doi:10.1039/c4ta04311a), 2014-09-08
Supplement: c4ta04311a1.pdf [file c4ta04311a1.pdf]

## **Synthesis of amino-functionalized metal-organic framework at nanoscale for highly dispersed gold nanoparticle deposition and catalysis**

*Yi Luan, Yue Qi, Hongyi Gao, Nannan Zheng, Ge Wang\**

*School of Materials Science and Engineering, University of Science and Technology  
Beijing, Beijing 100083, P. R. China Fax: +86 10 62327878; Tel: +86 10 62333765; E-  
mail: gewang@mater.ustb.edu.cn*

### **Supporting Information**

#### **Table of Contents**

|                                                                         |     |
|-------------------------------------------------------------------------|-----|
| General information .....                                               | S2  |
| Characterizations.....                                                  | S3  |
| Synthesis of Au(0) catalyst .....                                       | S11 |
| Reduction of 4-Nitrophenol using NaBH <sub>4</sub> .....                | S15 |
| Compound versus internal standard for GC-MS calibration.....            | S16 |
| In-situ monitoring of aerobic oxidation reaction for Table 3.....       | S21 |
| The isolated yield determination for aerobic oxidation of alcohol ..... | S41 |

**General Information.** The phase composition of the samples were investigated by X-ray powder diffraction (XRD, M21X, Cu K $\alpha$  radiation,  $\lambda=0.154178$  nm). Their morphology and structure of the as-obtained product was characterized by scanning electron microscopy (SEM, ZEISS SUPRA55). Further information of the structure were revealed by transmission electron microscopy (TEM, TEI Tecnai F20) and high-resolution TEM (HRTEM, TEI Tecnai F20) using TEI Tecnai F20. The samples for the SEM, TEM and HRTEM measurements were first dispersed in ethanol and sonicated for a few minutes, and then supported onto the silicon slice and the holey carbon film on a Cu grid, respectively. The chemical compositions were analyzed using X-ray photoelectron spectrometer (XPS, ESCALAB 250Xi) and inductively coupled plasma-atomic emission spectrometry (ICP-AES, Vavian 715-ES). Thermogravimetric analysis (TG) were conducted by a TGA instrument (Netzsch STA449F) at a heating rate of 10°C/min under an N<sub>2</sub> flow. The specific surface areas were calculated by nitrogen sorption–desorption isotherms using a Micromeritics ASAP 2420 adsorption analyzer. The pore size distributions were derived from the adsorption branches of isotherms by using the Barrett–Joyner–Halenda (BJH) model. Fourier transform Infrared spectra (FTIR) were acquired on a Nicolet 6700 using the KBr pellet technique. The catalytic results were analyzed by a gas chromatography-mass spectrum (GC-MS, Agilent7890/5975C-GC/MSD).

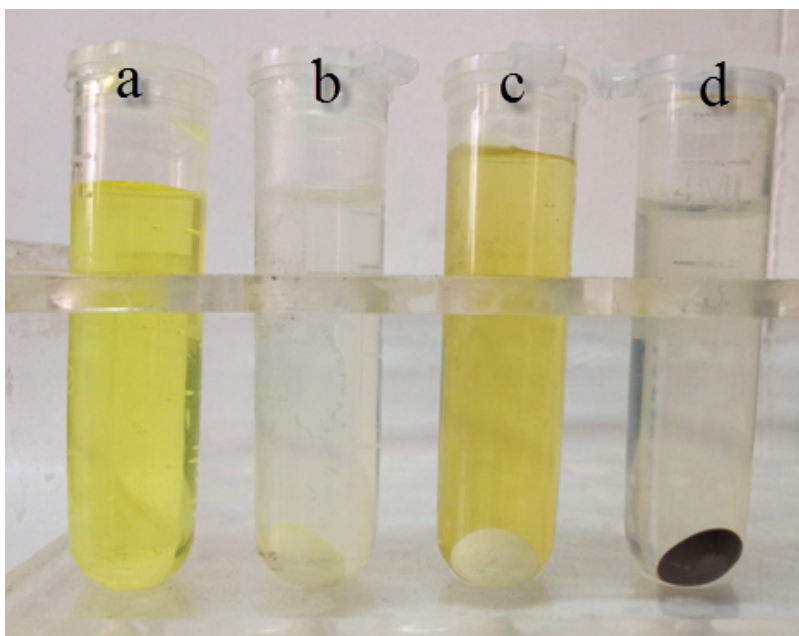

Figure S1. Amino functionalized MOFs for  $\text{HAuCl}_4$  absorption. (a)  $\text{HAuCl}_4$  solution. (b) Centrifuged  $\text{UiO-66(NH}_2\text{)}$  in solution (c) Time zero when  $\text{UiO-66(NH}_2\text{)}$  was added to  $\text{HAuCl}_4$  solution (centrifuged) (d) 10 min after  $\text{UiO-66(NH}_2\text{)}$  was added to  $\text{HAuCl}_4$  solution (centrifuged)

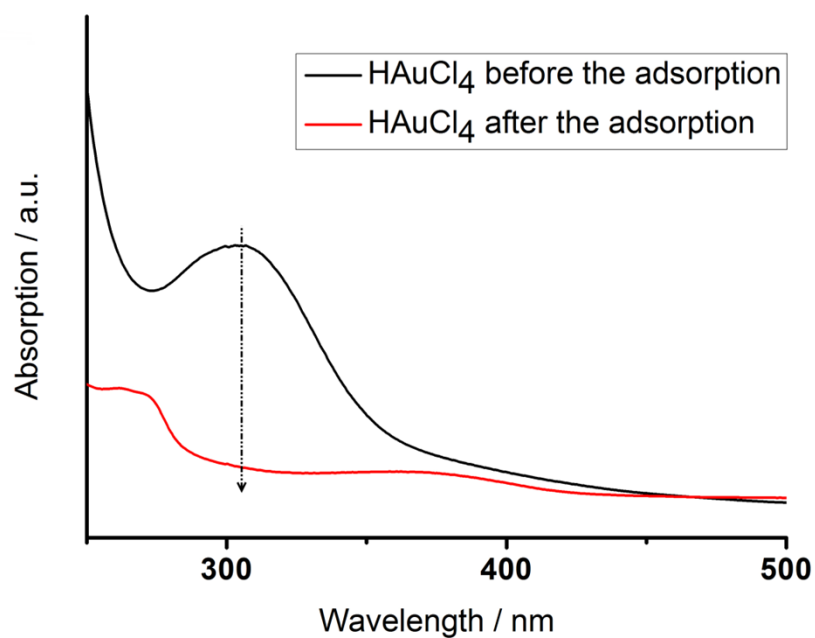

Figure S2. UV spectrum of  $\text{HAuCl}_4$  before and after the adsorption.

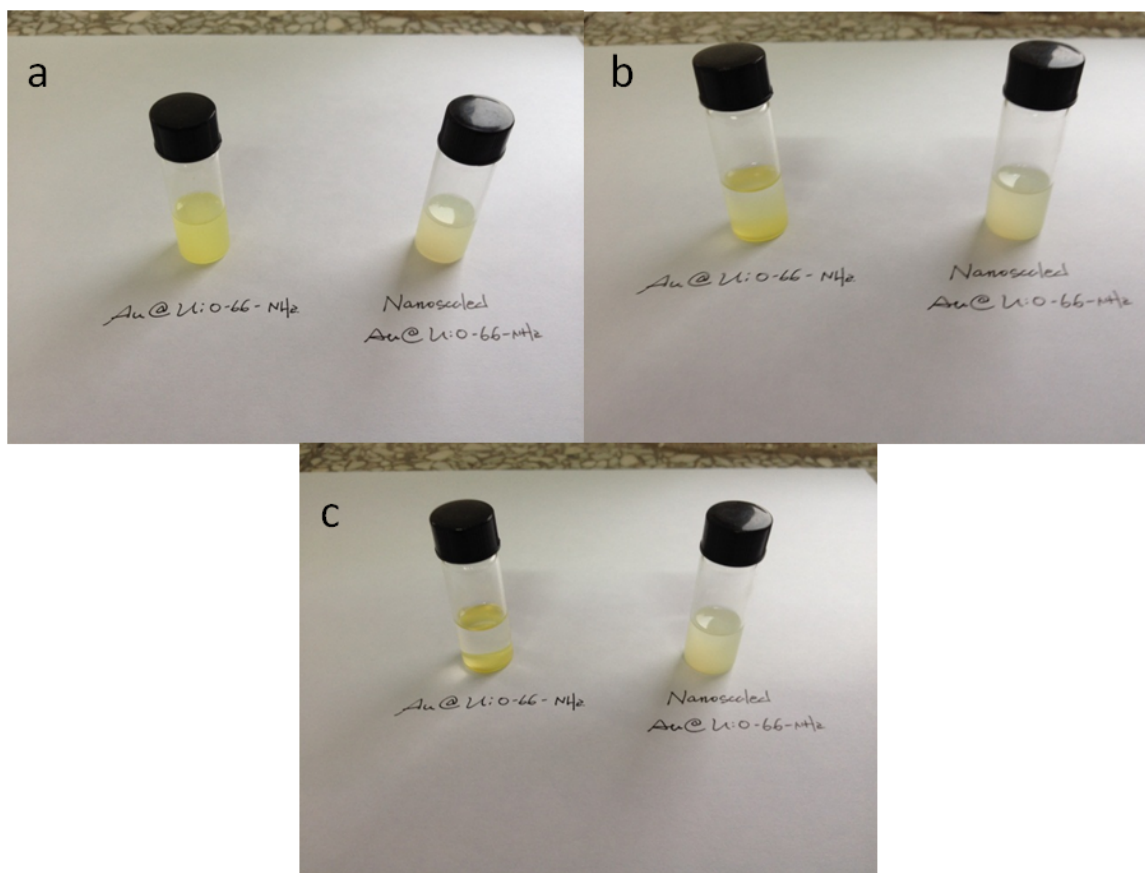

Figure S3. The dispersion of Au@UiO-66(NH<sub>2</sub>) and Au@nano UiO-66(NH<sub>2</sub>) in toluene solution. (a, 0 min, b, 5 min, c, 30 min)

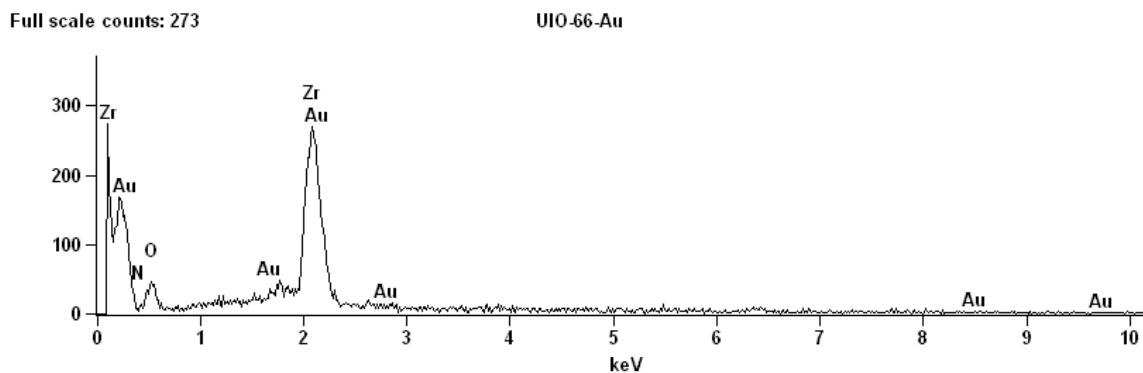

Live Time: 30.0 sec.

Acc.Voltage: 15.0 kV Take Off Angle: 35.0 deg.

#### Quantitative Results

| <i>Element</i> | <i>Net</i>    | <i>Net Counts</i> |     | <i>Weight %</i> | <i>Weight %</i> | <i>Atom %</i> | <i>Atom %</i> |
|----------------|---------------|-------------------|-----|-----------------|-----------------|---------------|---------------|
| <i>Line</i>    | <i>Counts</i> | <i>Error</i>      |     |                 | <i>Error</i>    |               | <i>Error</i>  |
| <i>N K</i>     | 39            | +/-               | 36  | 11.25           | +/-10.39        | 22.32         | +/-20.60      |
| <i>O K</i>     | 527           | +/-               | 33  | 36.11           | +/- 2.26        | 62.71         | +/- 3.93      |
| <i>Zr L</i>    | 5273          | +/-               | 145 | 46.15           | +/- 1.27        | 14.06         | +/- 0.39      |
| <i>Au L</i>    | 19            | +/-               | 22  | 6.49            | +/- 7.51        | 0.91          | +/- 1.06      |
| <i>Total</i>   |               |                   |     | 100.00          |                 | 100.00        |               |

Figure S4. EDX results of 1.8 wt% Au@UiO-66(NH<sub>2</sub>)

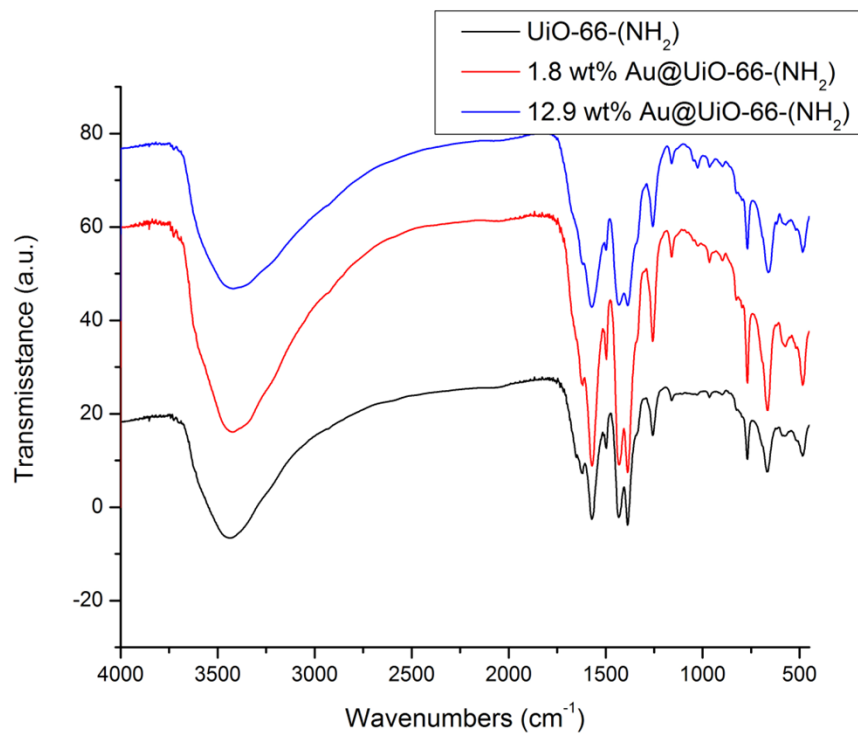

Figure S5. FTIR of UiO-66(NH<sub>2</sub>) and various loading of Au@UiO-66(NH<sub>2</sub>).

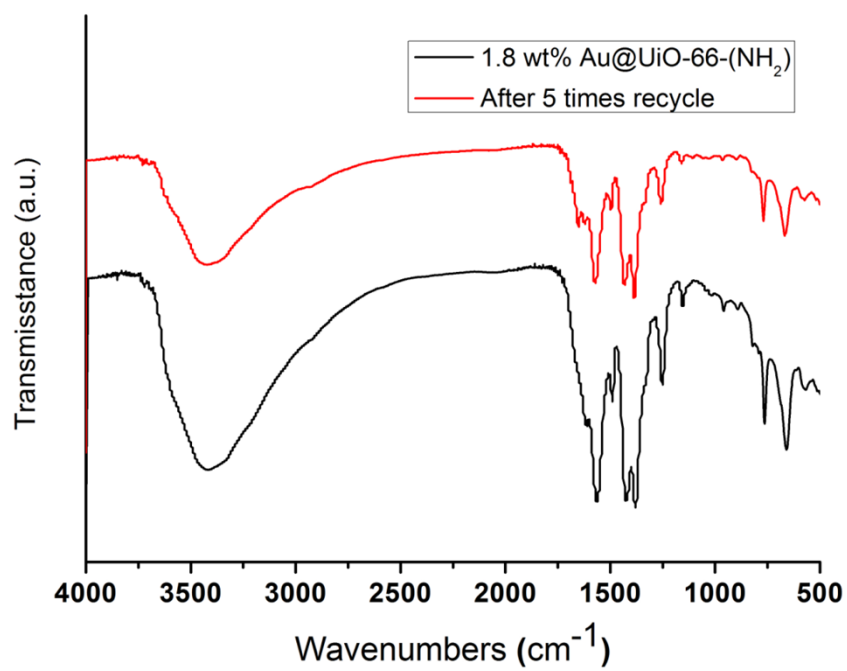

Figure. S6. FTIR of recycled 1.8 wt% Au@UiO-66(NH<sub>2</sub>)

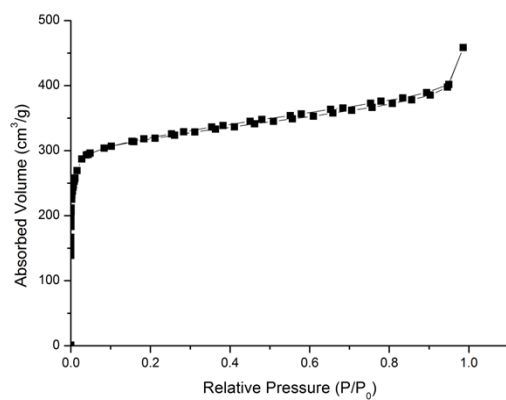

Figure S7. BET adsorption-desorption isotherms of UiO-66(NH<sub>2</sub>)

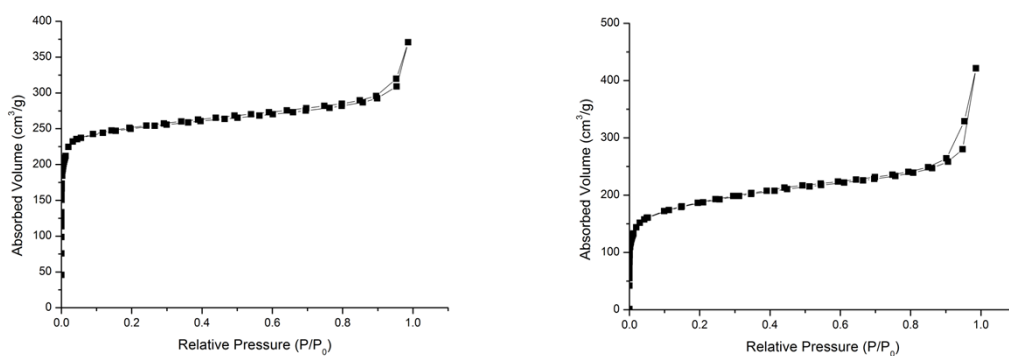

Figure S8. BET adsorption-desorption isotherms of (left) 1.8 wt% Au@UiO-66(NH<sub>2</sub>) (right) 12.9 wt% Au@UiO-66(NH<sub>2</sub>)

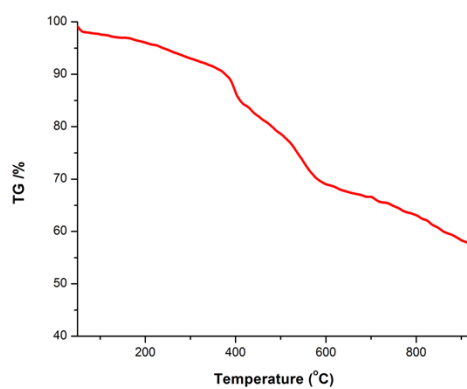

Figure S9. TGA curve for the as-synthesized nanosized UiO-66(NH<sub>2</sub>)

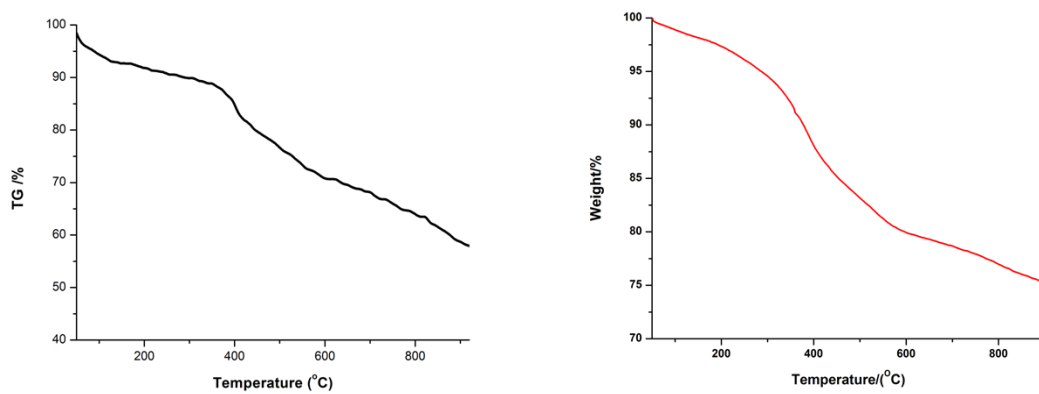

Figure S10. TGA curve for 1.8 wt% Au@UiO-66(NH<sub>2</sub>) (left) and 12.9 wt% Au@UiO-66(NH<sub>2</sub>)



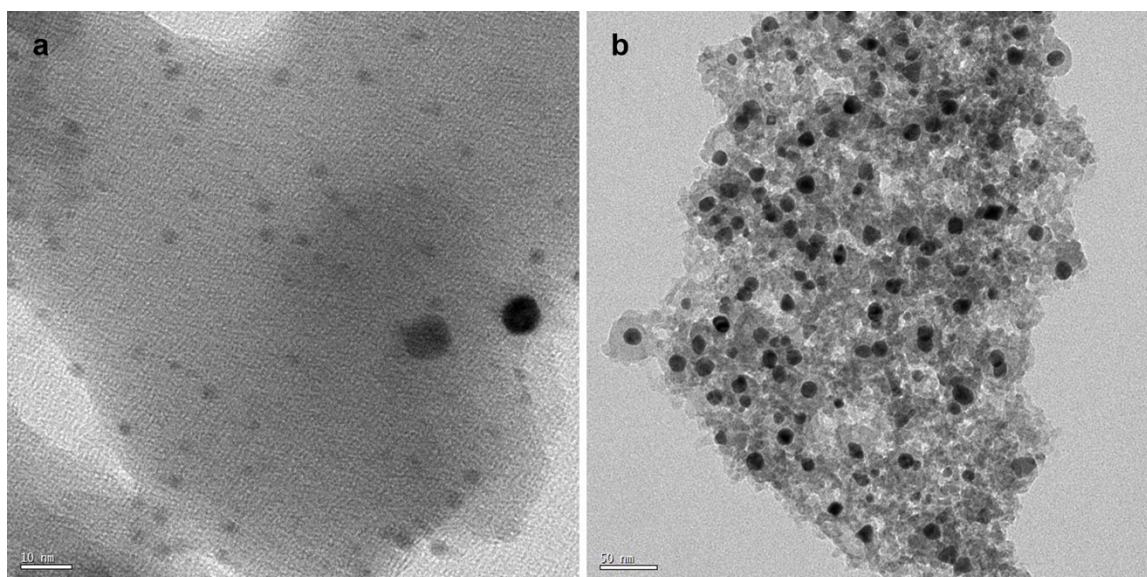

Figure S11. HRTEM images Au@IRMOF-3.

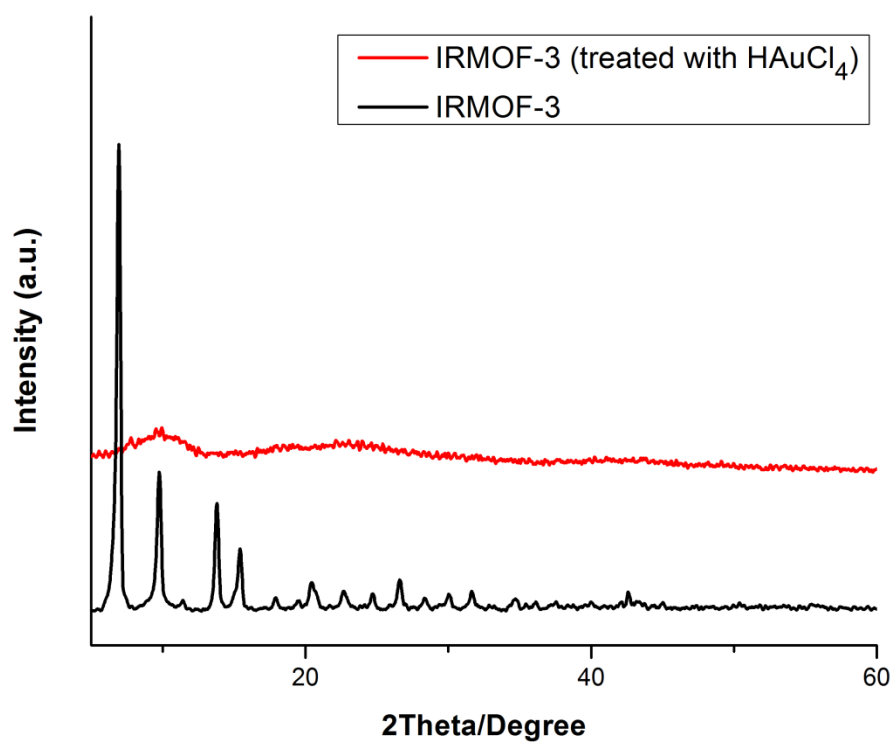

Figure S12. PXRD of IRMOF-3 and IRMOF-3 after  $\text{HAuCl}_4$  and  $\text{NaBH}_4$  treatment.

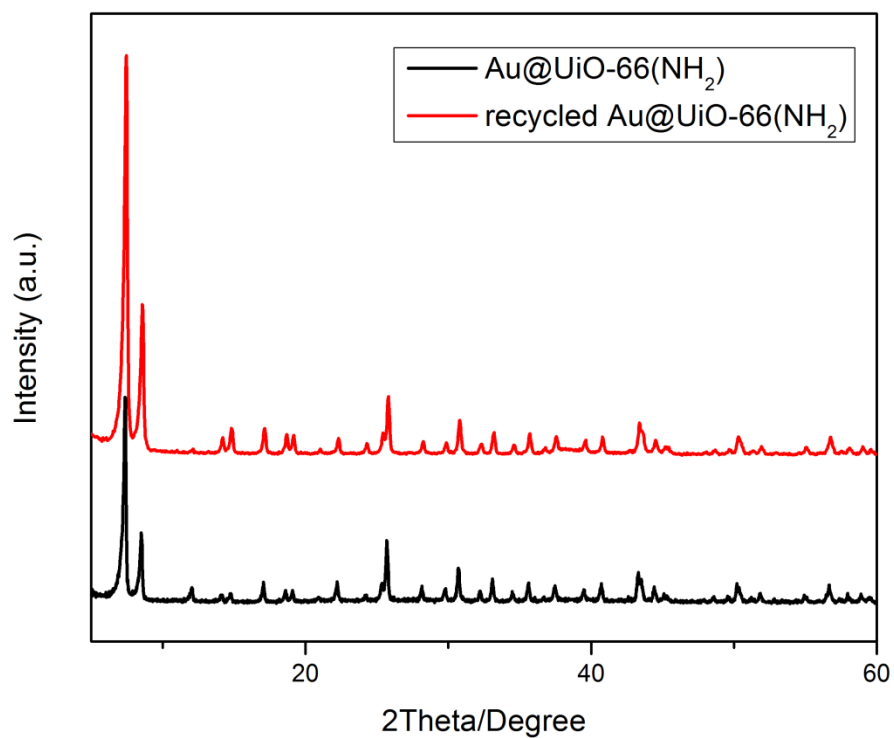

Figure S13. PXRD of recycled 1.8 wt%  $\text{Au@UiO-66(NH}_2\text{)}$  catalyst after five times. 1.8 wt%  $\text{Au@UiO-66(NH}_2\text{)}$  (Bottom), recycled 1.8 wt%  $\text{Au@UiO-66(NH}_2\text{)}$  (Top).

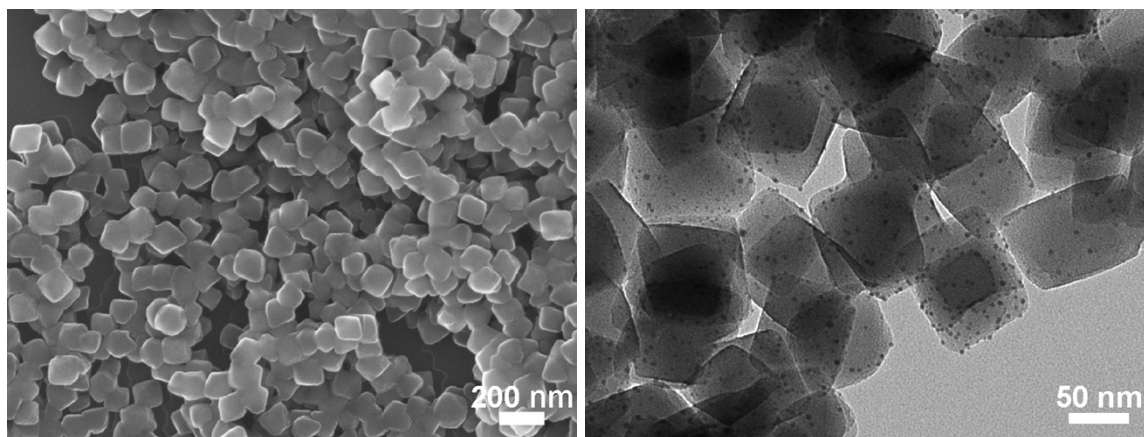

Figure S14. SEM and TEM of 1.8 wt%  $\text{Au@UiO-66(NH}_2\text{)}$  after recycled for 5 times in the aerobic oxidation.

## Synthesis of unsupported gold stabilized by citrate

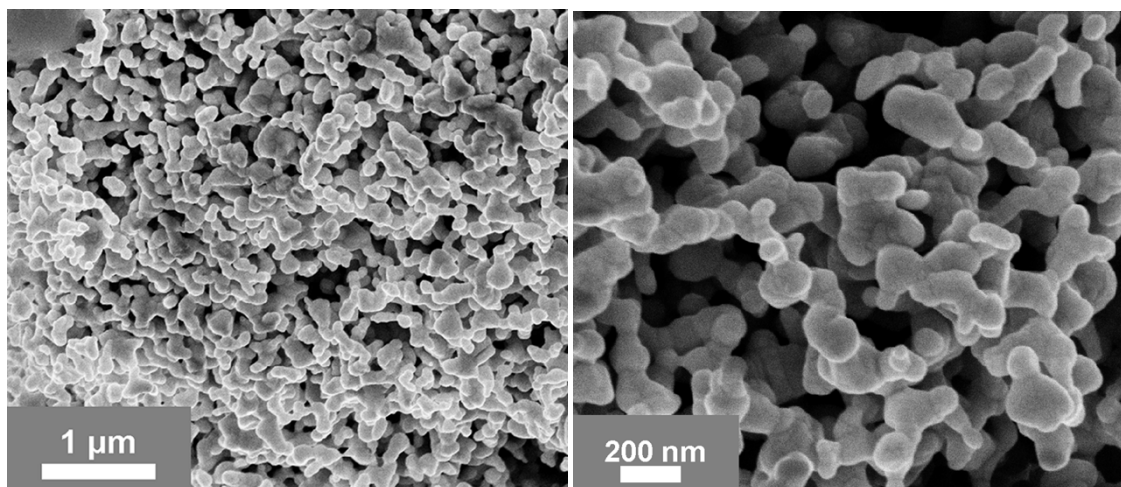

Figure S15. SEM images of citrate stabilized unsupported gold.

### Procedure of citrate stabilized gold nanoparticles synthesis

Citrate stabilized gold nanoparticles were prepared according to the literature procedure.<sup>1</sup> A 50 mL aqueous solution of  $\text{HAuCl}_4$  ( $2.5 \times 10^{-3}$  M) was heated to boiling, then 2 mL of trisodium citrate solution (1% by wt) was added to it under continuous stirring. After 20s, the solution turned faint blue. The reaction solution was boiled for another 30 min in order to achieve complete reduction of Au(III) ions. The resulting unsupported gold was separated through centrifugation and washed with water ( $3 \times 15$  mL).

---

<sup>1</sup> Tarasankar Pal, etc. J. Phys. Chem. C, 2007, 111 (12), pp 4596–4605

## Synthesis of Au@TiO<sub>2</sub>

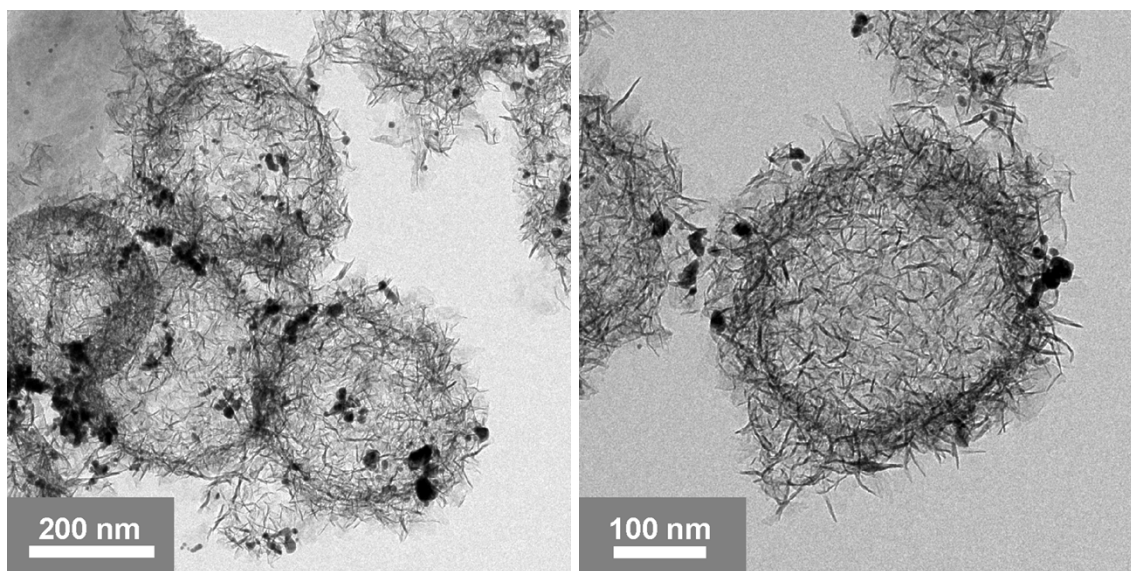

Figure S16. TEM images of Au@TiO<sub>2</sub>

## Procedure of Au@TiO<sub>2</sub> synthesis<sup>2</sup>

### Synthesis of hierarchical titanate 3D nanospheres

0.8 mL of 0.1 M aqueous potassium chloride was injected into a mixture of 160 mL ethanol and 0.05 g hydroxypropyl cellulose (HPC), and added 4.4 mL tetrabutyl titanate at ambient temperature under magnetic stirring until a white precipitate appeared. Then the suspension was sit in static condition for 24 h in a closed container at room temperature. The TiO<sub>2</sub> precipitation was collected by centrifugation and washed with ethanol for 3 times and deionized water for 3 times. An amount of 0.025 g of the TiO<sub>2</sub> precipitation was added in aqueous NaOH solution (15 mL, 1 M), and then transferred into a 25 mL Teflon-lined stainless-steel autoclave. The autoclave was sealed and heated in an oven at 150 °C for 12 h, and then cooled to room temperature. The resultant precipitate was collected by filtration, washed thoroughly with deionized water and ethanol for 3 times, respectively.

### Synthesis of Au@TiO<sub>2</sub>

Hierarchical titanate 3D nanospheres (0.05 g) were dispersed in 10 mL deionized water and then placed in a 250 mL three-necked round bottom flask with a mechanical stirrer. An aqueous solution of HAuCl<sub>4</sub> (2.5 mL, 0.025 M aqueous solution) was added and the

<sup>2</sup> Y. Qi and G. Wang, etc. Applied Surface Science, 2014, 293, 359–365.

mixture was stirred at 300 rpm for 4 h in an ice-bath. Subsequently  $\text{NaBH}_4$  aqueous solution (10 mL, 0.05 M aqueous solution) was rapidly added and the reaction continued for 0.5 h at 0 °C with vigorous stirring. The  $\text{Au@TiO}_2$  product was separated by centrifugation, washed three times with deionized water to remove excess  $\text{NaBH}_4$  and dried under vacuum. ICP-AES analysis shows a gold content of 2.8 wt% for  $\text{Au@TiO}_2$ .

### Synthesis of $\text{Au@PANI}$

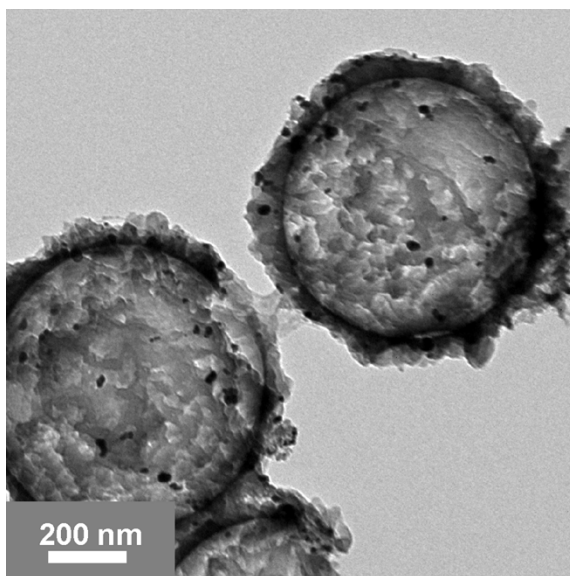

Figure S17. TEM image of  $\text{Au@PANI}$

### Procedure of $\text{Au@PANI}$ synthesis<sup>3</sup>

#### Synthesis of polystyrene (PS) template

In a 250 mL four-necked round-bottom flask, 140 mL of deionized water and 10 g of styrene were placed in with a mechanical stirrer, a  $\text{N}_2$  inlet and a reflux condenser. Then  $\text{N}_2$  was bubbled through the solution to remove oxygen for 10 min while stirring (300 rpm), and heated to 70 °C via oil bath. At this time, 10 mL of KPS aqueous solution (0.023 g/mL) was injected into the flask to initiate the polymerization. The reaction mixture was stirred at 70 °C for 24 h, then PS microspheres were collected by

---

<sup>3</sup>  $\text{Au@PANI}$  preparation is achieved according to the literature procedure. W. C. Guo and G. Wang, etc. Chemistry – An Asian Journal, 2013, 8, 1160–1167.

centrifugation and washed with water and ethanol three times. The PS microspheres precipitate was then dried under vacuum.

#### Preparation of polystyrene/polyaniline (PS/PANI) support

PS microspheres (0.3 g) were added to 20 mL deionized water and dispersed to form an emulsion. 3 mmol of aniline was subsequently added to the emulsion under vigorous stirring with a magnetic stir bar at room temperature for 12 h to swell the monomer into the PS templates. After the swelling of the templates, the  $\text{Fe}(\text{NO}_3)_3 \cdot 9\text{H}_2\text{O}$  was added as oxidant. The reaction was stirred for 12 h, the composite microspheres were centrifuged, washed with water until the supernatant became colorless, and dried under vacuum.

#### Gold nanoparticles immobilization on PS/PANI support

PS/PANI (0.05 g) composite microspheres were dispersed in 10 mL deionized water and then placed in a 250 mL three-necked round bottom flask with a mechanical stirrer. An aqueous solution of  $\text{HAuCl}_4$  (2.5 mL, 0.025 M aqueous solution) was added and the mixture was stirred at 300 rpm for 4 h in an ice-bath. Subsequently  $\text{NaBH}_4$  aqueous solution (10 mL, 0.05 M aqueous solution) was rapidly added and the reaction continued for 0.5 h at 0 °C with vigorous stirring. The product was separated by centrifugation, washed three times with deionized water to remove excess  $\text{NaBH}_4$  and dried under vacuum.

#### Preparation of hollow Au@PANI catalyst

0.03 g PS/PANI@Au nanocatalyst was dispersed in 5 mL of THF and stirred for 24 h at room temperature to remove the PS template. The product was centrifuged, washed with ethanol, and dried under vacuum. ICP-AES analysis shows a gold content of 2.4 wt%.

### Reduction of 4-Nitrophenol using NaBH<sub>4</sub>.

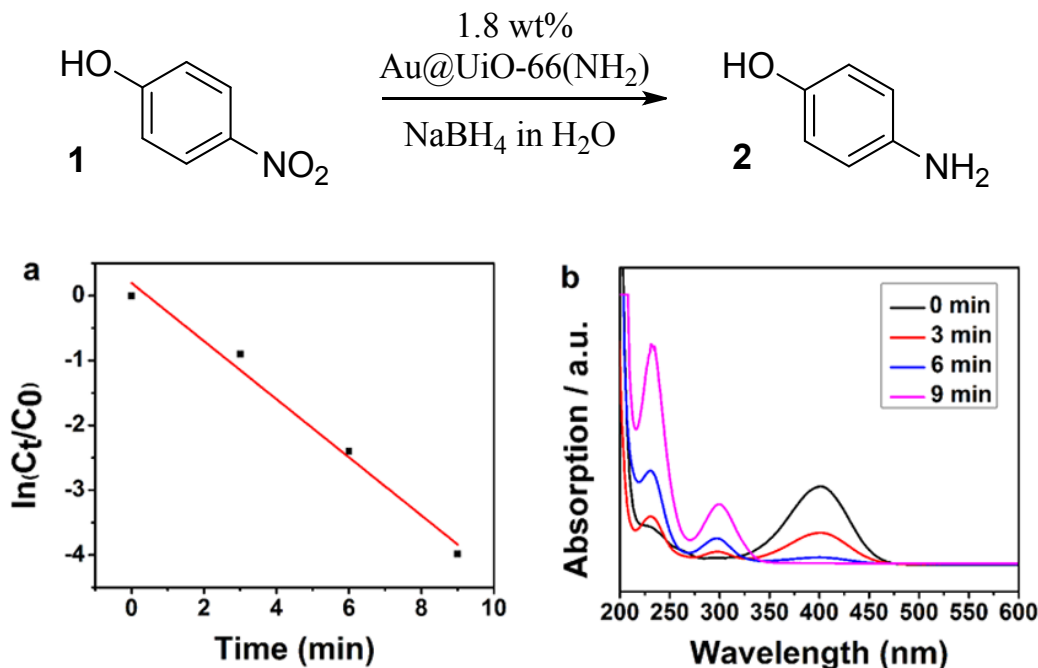

Figure S18. Catalytic reduction of 4-nitrophenol by NaBH<sub>4</sub> over Au@UiO-66(NH<sub>2</sub>).

The reduction of 4-NP was carried out in a centrifuge tube and was monitored by UV/Vis spectroscopy at room temperature. The alcohol solution of 4-NP (0.005 M, 2 mL) was added to an ethanol dispersion of the Au@UiO-66(NH<sub>2</sub>) catalyst (1.8 wt%, 0.01 g). Then, freshly prepared NaBH<sub>4</sub> (0.2 M, 10 mL) was added rapidly. The catalytic reaction solution was monitored by UV/Vis spectroscopy every 3 min until the solution became colorless. The linear relationship between  $\ln(C_t/C_0)$  and reaction time was elucidated, which showed the 4-nitrophenol reduction occurred under first-order reaction kinetics (Fig. 18b). Here  $C_t$  was defined as absorbance of 4-nitrophenol at the fixed intervals, and  $C_0$  as absorbance of 4-nitrophenol at the initial stage. The first-order rate constant ( $k$ ) was calculated to be  $-0.45 \text{ min}^{-1}$  for Au@UiO-66(NH<sub>2</sub>).

However, it is observed that the crystalline structure of MOF support tended to decompose slowly over the course of the reaction according to the XRD analysis, which has not been reported in other Au@MOF reduction systems. The 4-nitrophenol reduction was designed to be finished within 15 minutes in order to avoid the loss of the crystalline of the MOF support. The NaBH<sub>4</sub>-promoted slow decomposition of UiO-66(NH<sub>2</sub>) support should be taken into consideration for future catalytic reaction design.

## Compound versus internal standard for GC-MS calibration.

Table 3, entry 1

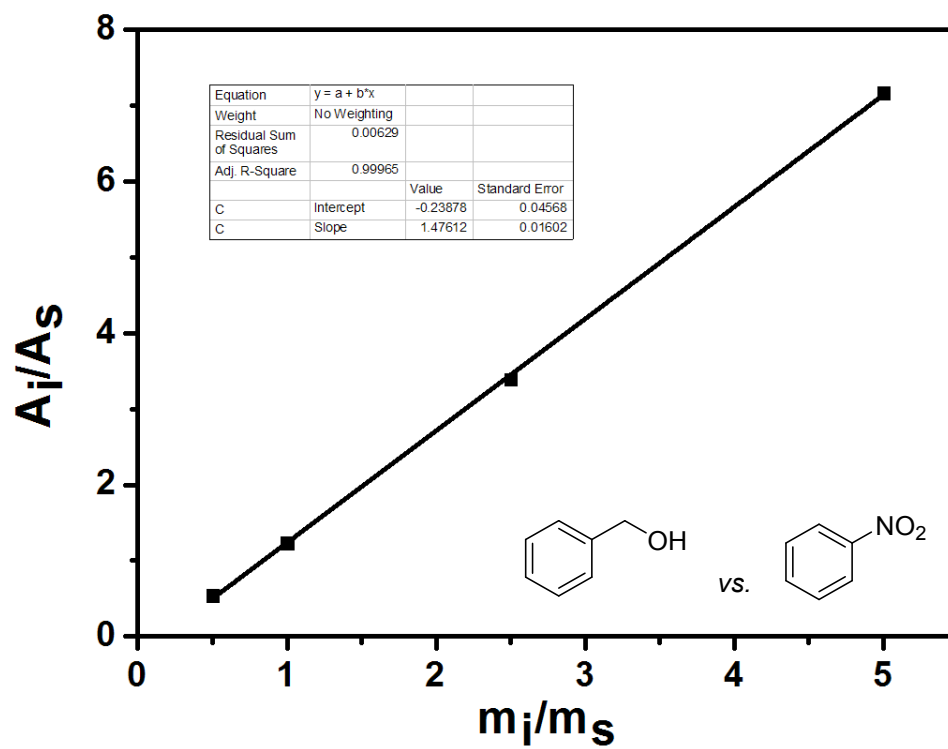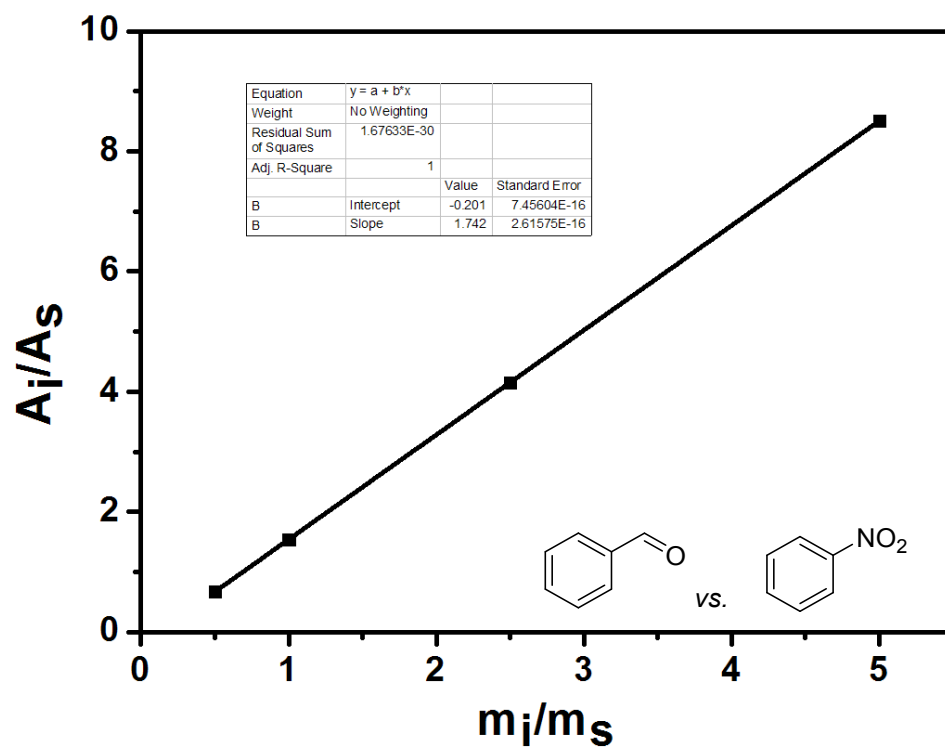



Table 3, entry 2

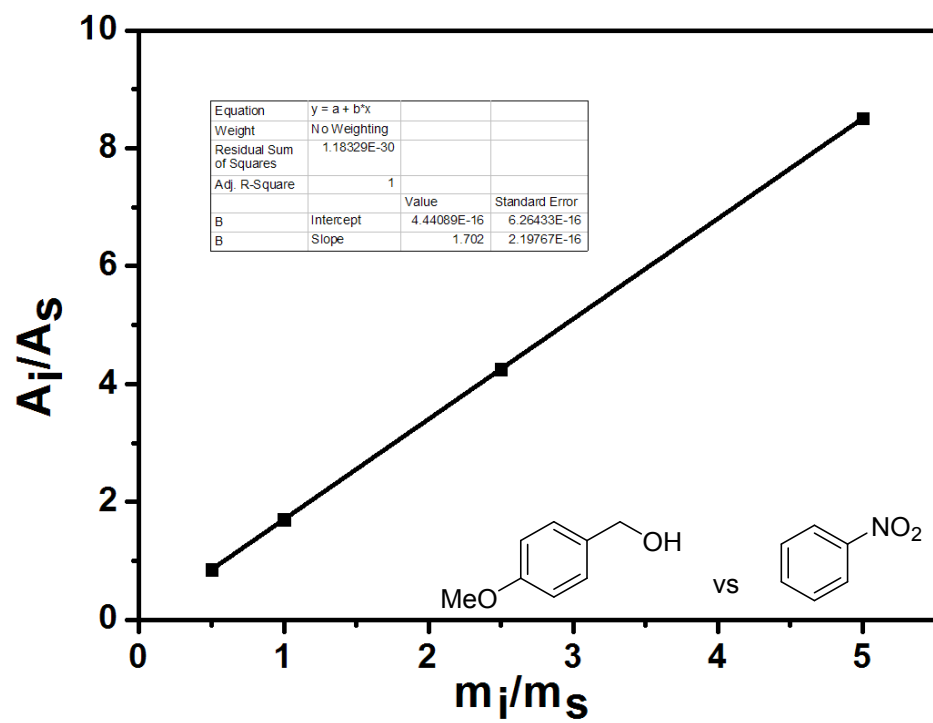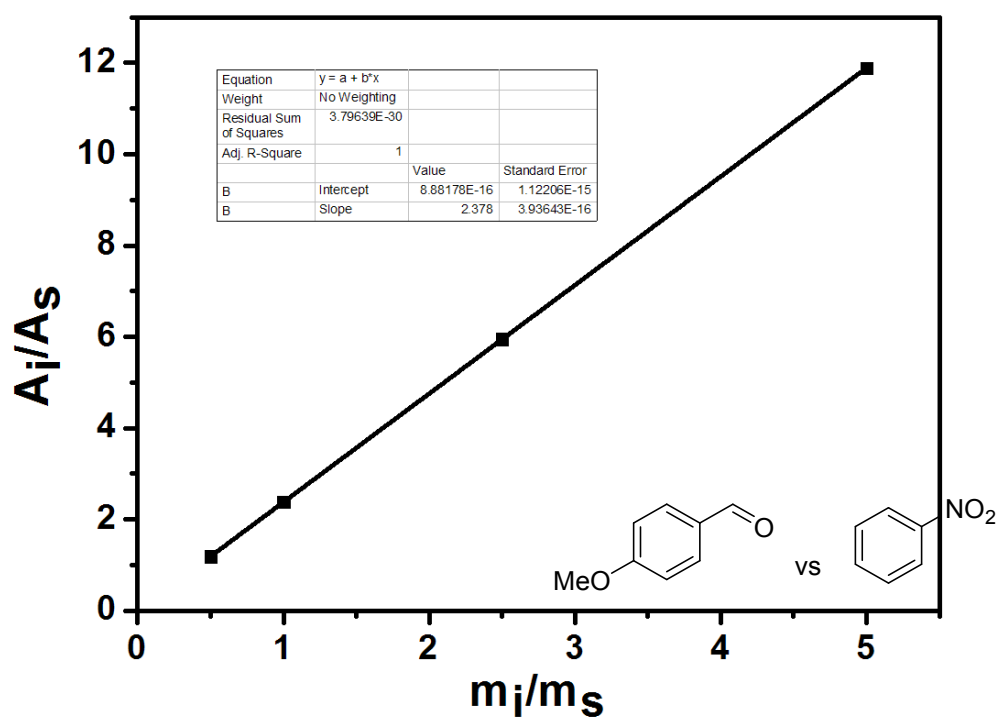

Table 3, entry 3

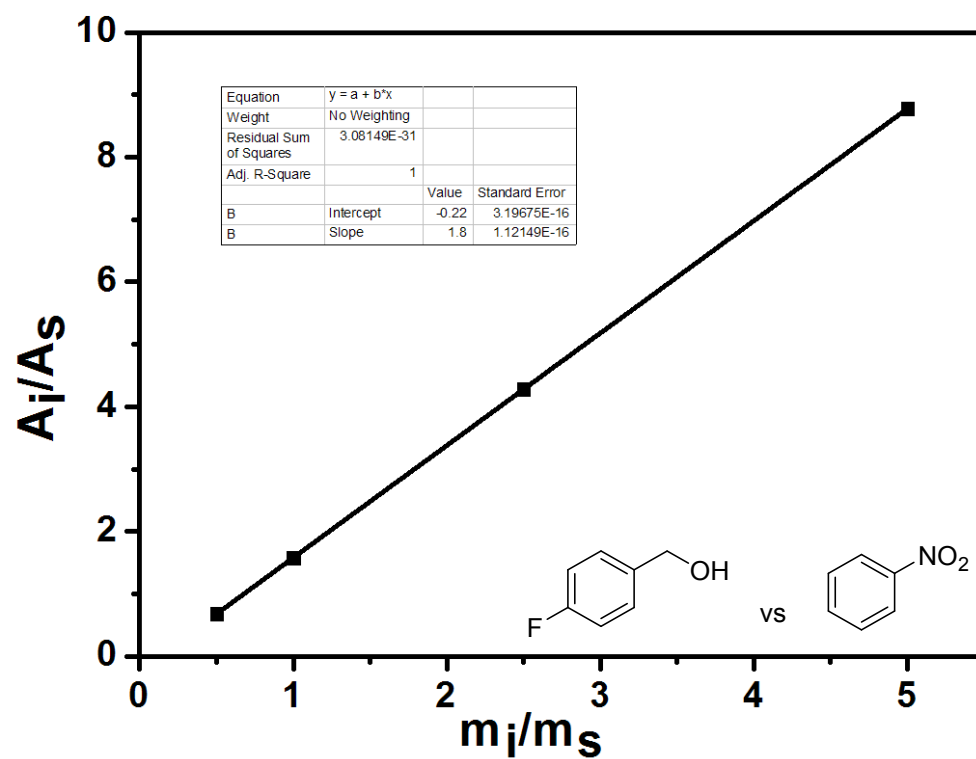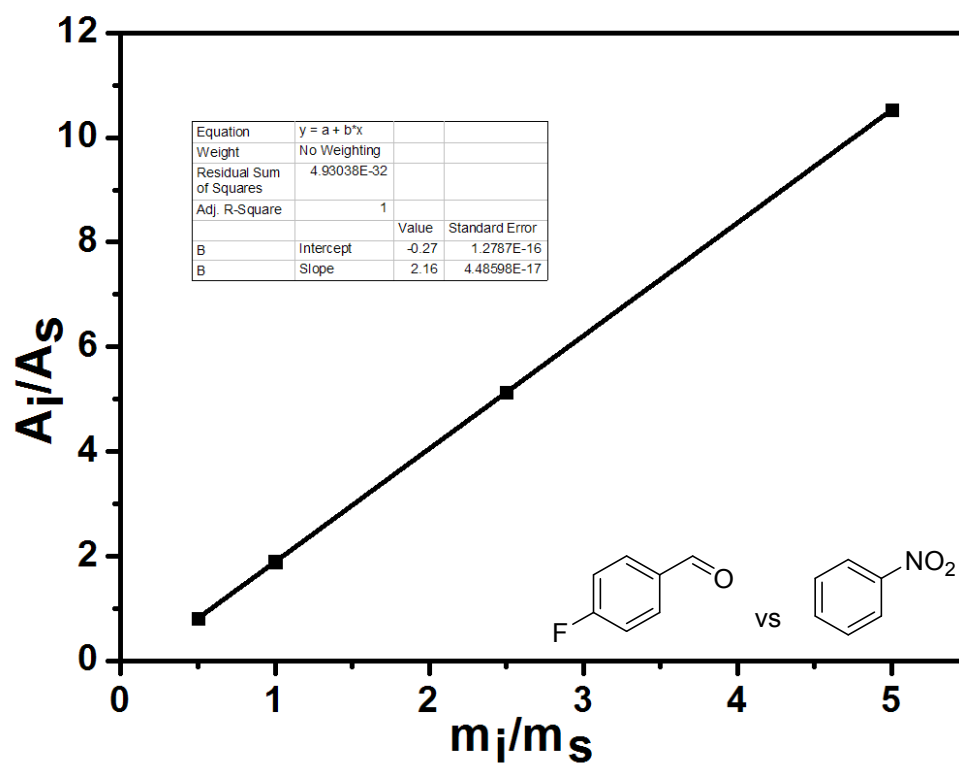

Table 3, entry 4

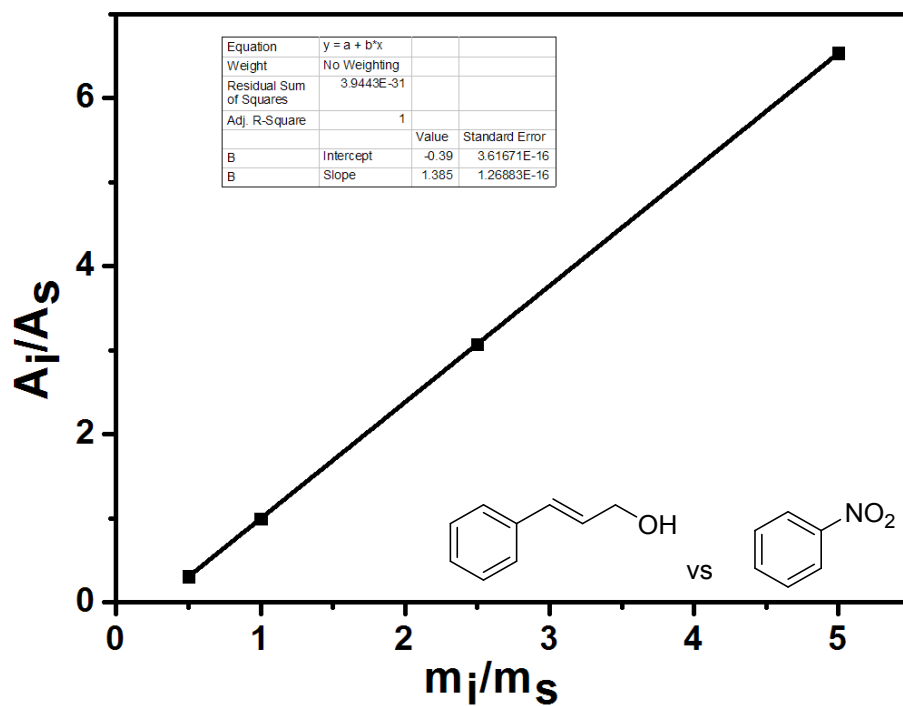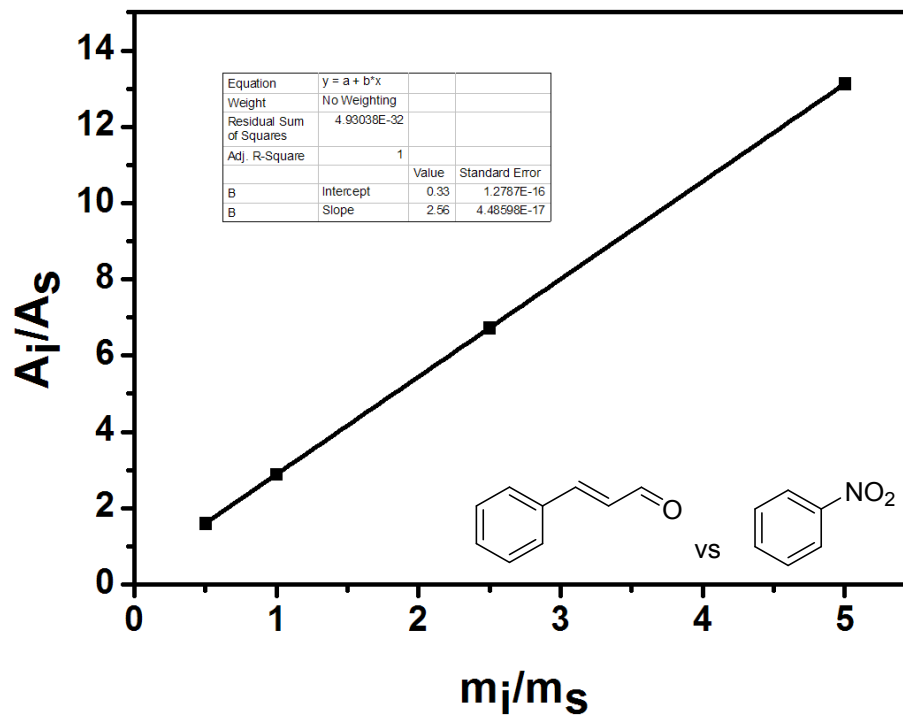

Table 3, entry 5

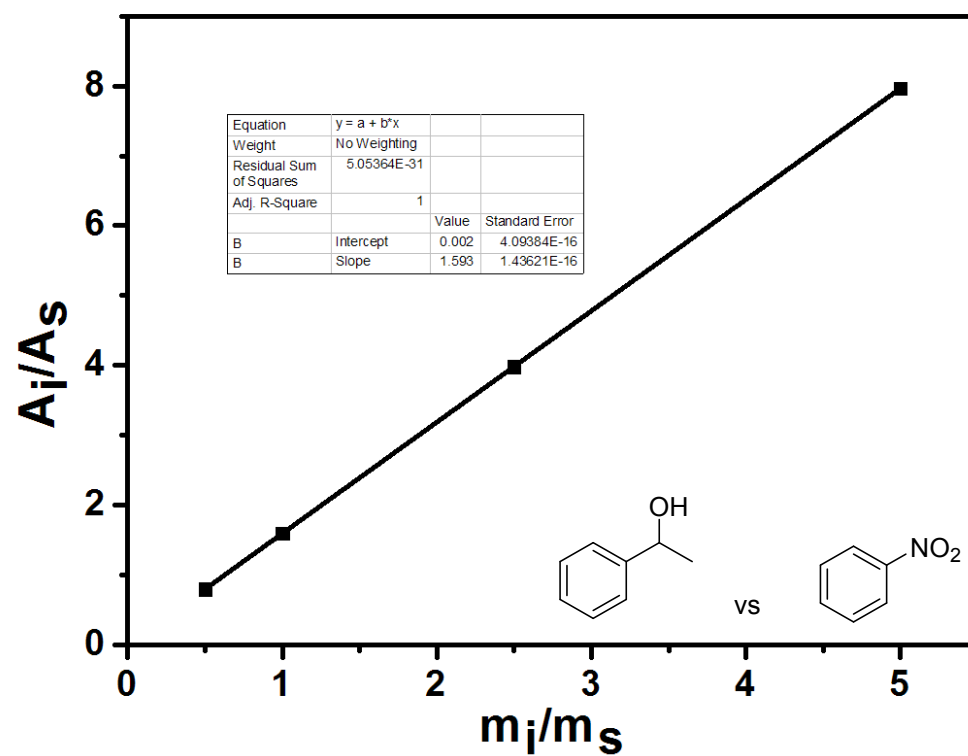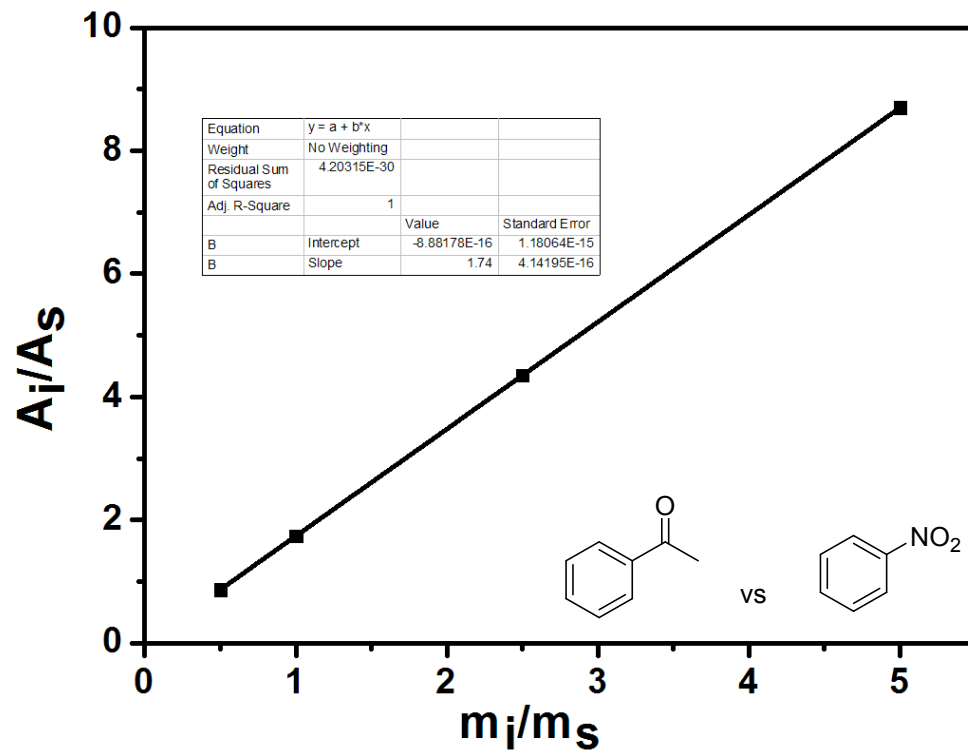

### In-situ monitoring of aerobic oxidation reaction for Table 3.

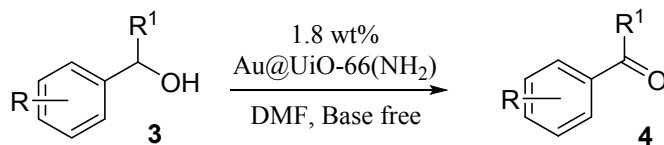

The in-situ GC-MS monitoring of conversion and yield was performed through direct injection of reaction solution after 10 times dilution. The in-situ  $^1\text{H}$  NMR monitoring of reaction conversion and yield was performed in DMF  $d_7$  solvent. The crude sample was filtered through a sodium sulfate layer and transferred to a NMR tube for direct  $^1\text{H}$  NMR analysis. There is no aqueous work-up for GC-MS and  $^1\text{H}$  NMR in-situ monitoring.

#### Table 3, entry 1

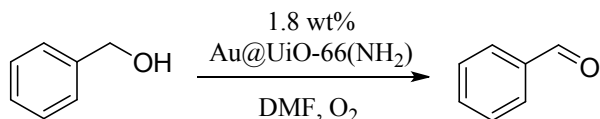

#### GC-MS at 0 min

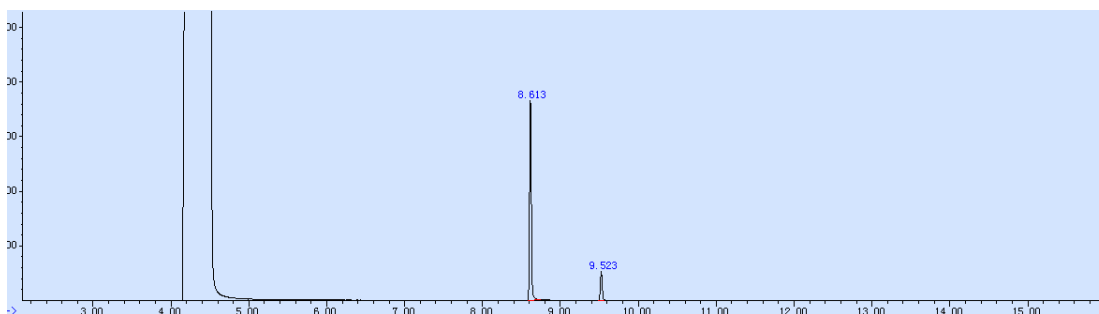

| Peak # | R.T. min | Ini. Scan | TOP Scan | Stp. Scan | Peak Type | Peak Height | Area     | %       | % area  |
|--------|----------|-----------|----------|-----------|-----------|-------------|----------|---------|---------|
| 1      | 8.613    | 1135      | 1140     | 1165      | M         | 1878216     | 30479347 | 100.00% | 87.972% |
| 2      | 9.523    | 1293      | 1300     | 1309      | M         | 265613      | 4167240  | 13.67%  | 12.028% |

## GC-MS at 20 min

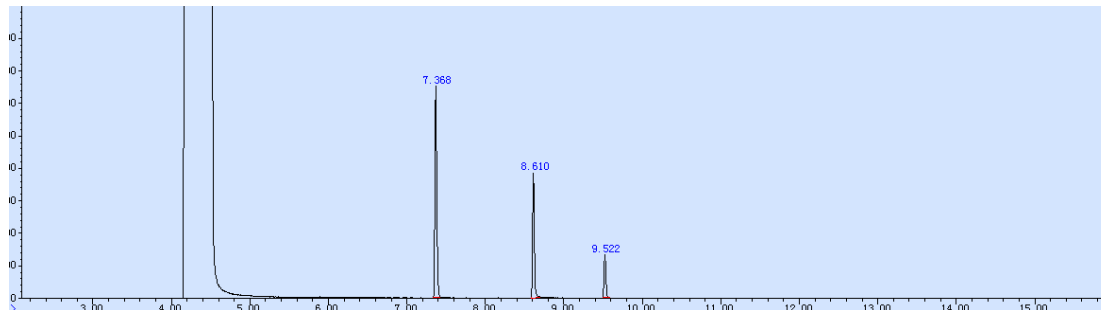

| Peak # | R.T. min | Ini. Scan | TOP Scan | Stp. Scan | Peak Type | Peak Height | Area     | %       | % area  |
|--------|----------|-----------|----------|-----------|-----------|-------------|----------|---------|---------|
| 1      | 7.368    | 918       | 923      | 935       | M         | 1301407     | 20330557 | 100.00% | 55.192% |
| 2      | 8.610    | 1136      | 1140     | 1157      | M         | 772170      | 12386745 | 60.93%  | 33.627% |
| 3      | 9.522    | 1295      | 1299     | 1311      | M         | 271372      | 4118954  | 20.26%  | 11.182% |

 $^1\text{H}$  NMR at 20 min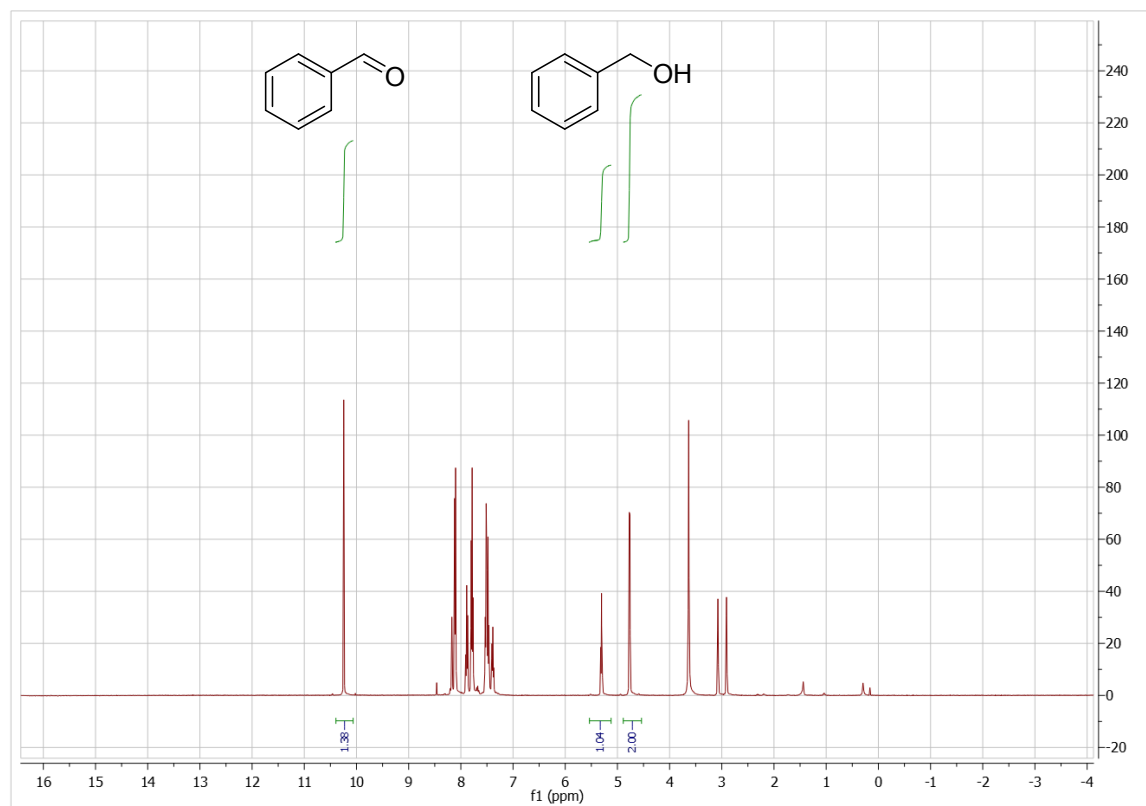

## GC-MS at 40 min

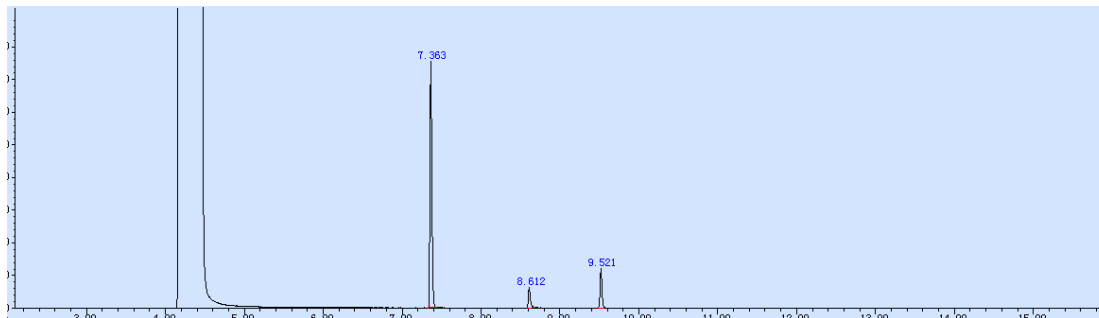

| Peak # | R.T. min | Ini. Scan | TOP Scan | Stp. Scan | Peak Type | Height  | Area     | %       | % area  |
|--------|----------|-----------|----------|-----------|-----------|---------|----------|---------|---------|
| 1      | 7.363    | 916       | 922      | 937       | M         | 1513945 | 24053393 | 100.00% | 80.415% |
| 2      | 8.612    | 1136      | 1140     | 1154      | M         | 124965  | 2164264  | 9.00%   | 7.236%  |
| 3      | 9.521    | 1293      | 1299     | 1308      | M         | 241647  | 3694011  | 15.36%  | 12.350% |

<sup>1</sup>H NMR at 40 min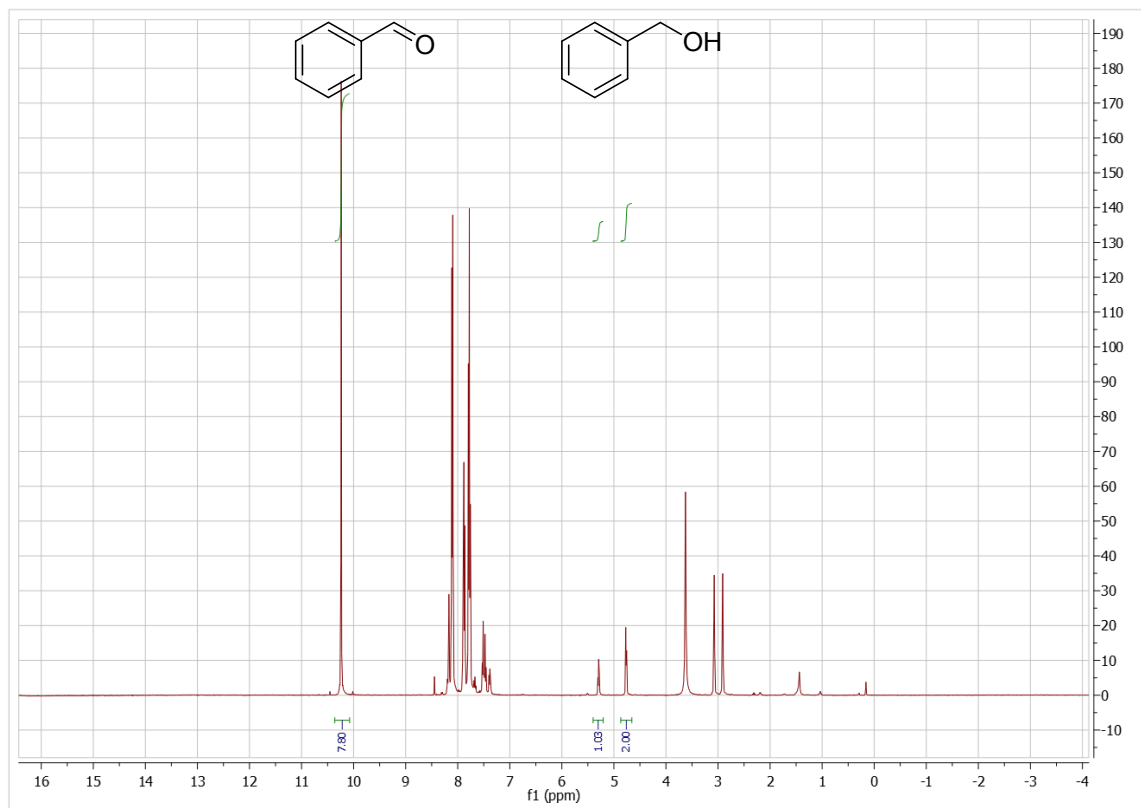

## GC-MS at 60 min

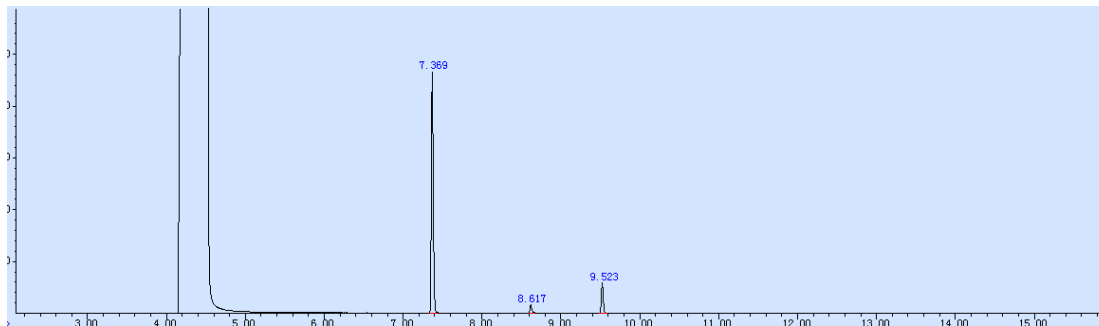

| Peak # | R.T. min | Ini. Scan | TOP Scan | Stp. Scan | Peak Type | Peak Height | Area     | %       | % area  |
|--------|----------|-----------|----------|-----------|-----------|-------------|----------|---------|---------|
| 1      | 7.369    | 918       | 923      | 933       | M         | 2332653     | 36933739 | 100.00% | 86.089% |
| 2      | 8.617    | 1138      | 1141     | 1153      | M         | 77303       | 1347104  | 3.65%   | 3.140%  |
| 3      | 9.523    | 1294      | 1300     | 1313      | M         | 295166      | 4620844  | 12.51%  | 10.771% |

 $^1\text{H}$  NMR at 60 min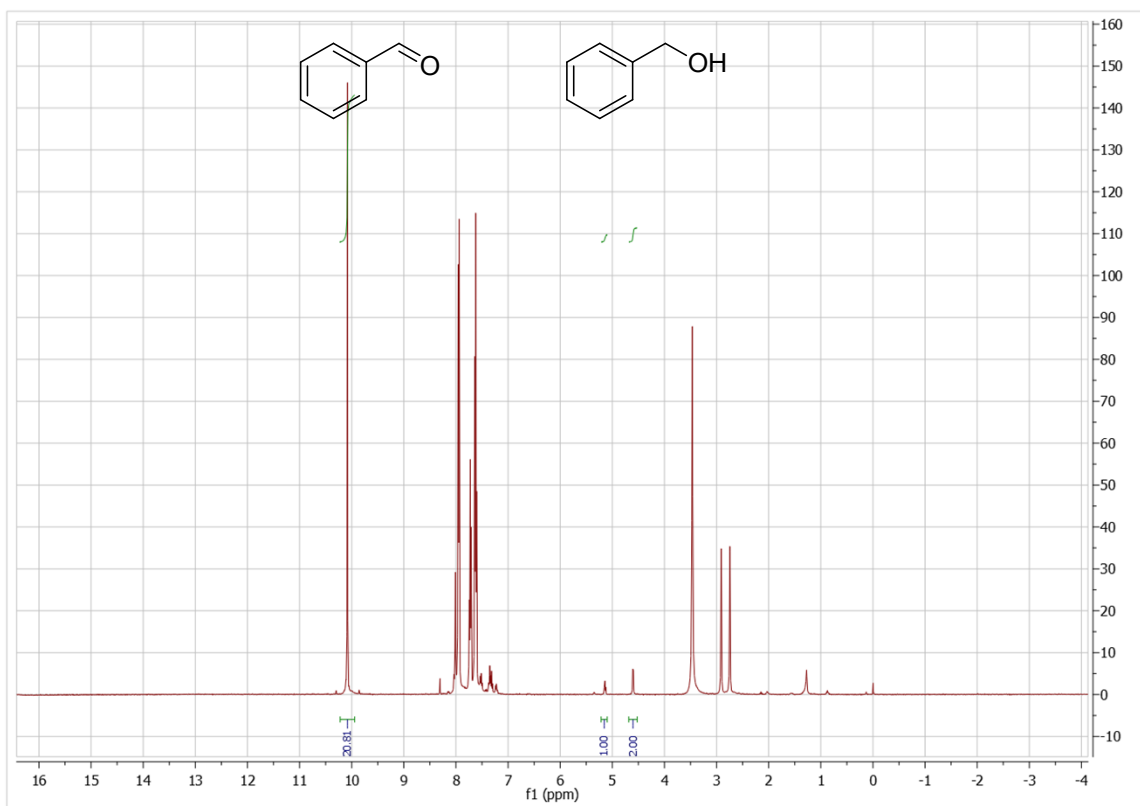



Table 3, entry 2

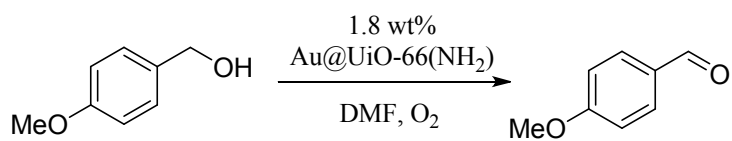

## GC-MS at 0 min

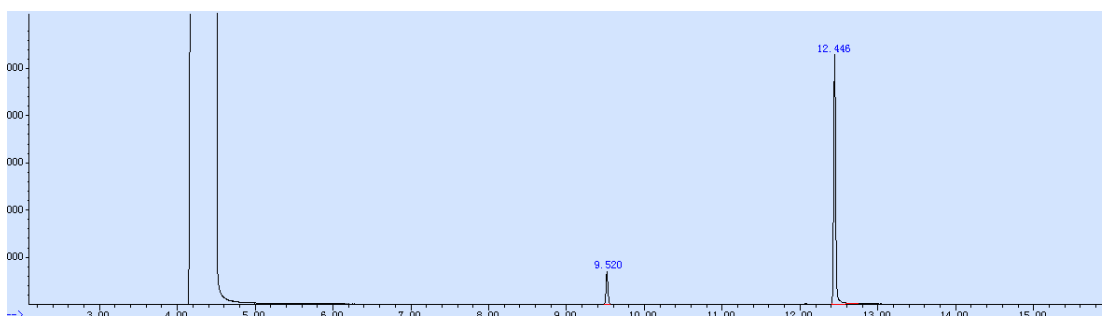

| Peak # | R.T. min | Ini. Scan | TOP Scan | Stp. Scan | Peak Type | Height  | Area     | %       | % area  |
|--------|----------|-----------|----------|-----------|-----------|---------|----------|---------|---------|
| 1      | 9.520    | 1293      | 1299     | 1308      | M         | 350796  | 5410317  | 11.75%  | 10.516% |
| 2      | 12.446   | 1804      | 1810     | 1865      | M         | 2693349 | 46037063 | 100.00% | 89.484% |

## GC-MS at 20 min

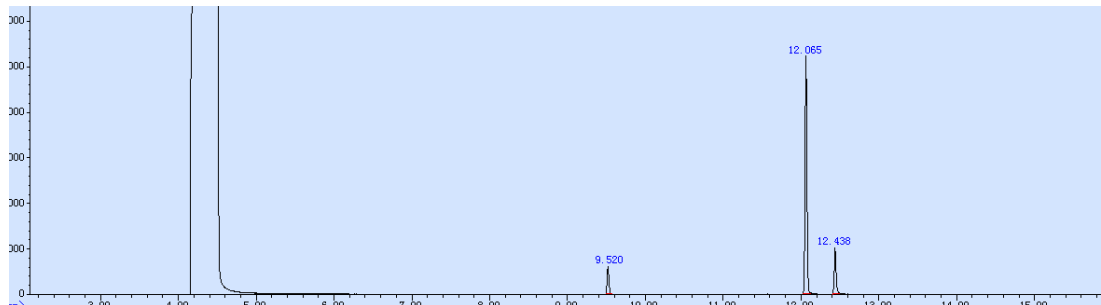

| Peak # | R.T. min | Ini. Scan | TOP Scan | Stp. Scan | Peak Type | Height Area      | % Area  | % area  |
|--------|----------|-----------|----------|-----------|-----------|------------------|---------|---------|
| 1      | 9.520    | 1295      | 1299     | 1307      | M         | 302964 4484677   | 10.58%  | 8.136%  |
| 2      | 12.065   | 1738      | 1744     | 1756      | M         | 2627309 42388701 | 100.00% | 76.897% |
| 3      | 12.438   | 1803      | 1809     | 1821      | M         | 509048 8250405   | 19.46%  | 14.967% |

<sup>1</sup>H NMR at 20 min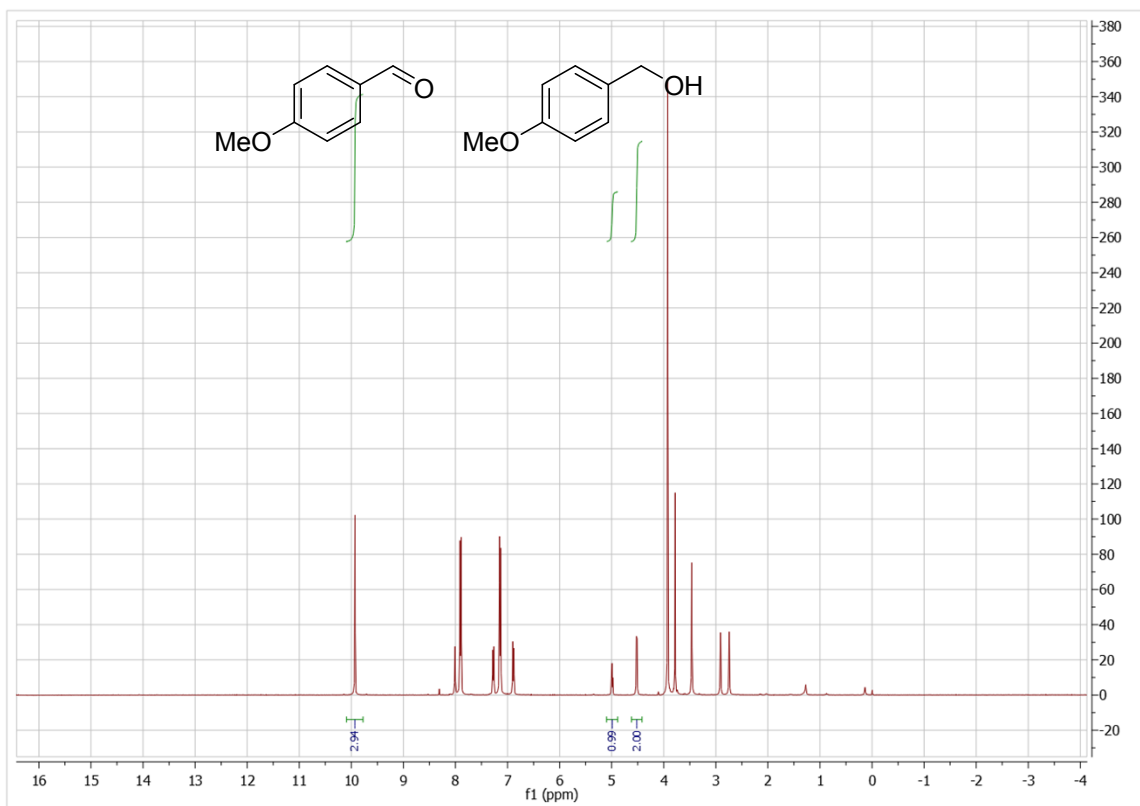

## GC-MS at 40 min

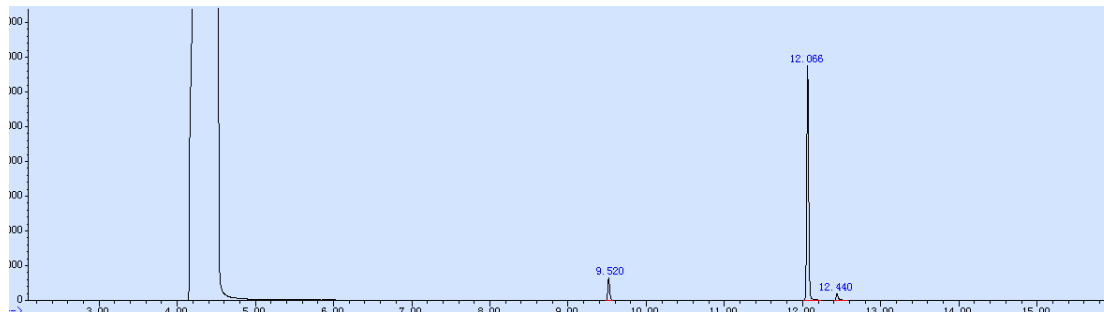

| Peak # | R.T. min | Ini. Scan | TOP Scan | Stp. Scan | Peak Type | Height  | Area     | %       | % area  |
|--------|----------|-----------|----------|-----------|-----------|---------|----------|---------|---------|
| 1      | 9.520    | 1294      | 1299     | 1309      | M         | 327004  | 5200959  | 9.36%   | 8.307%  |
| 2      | 12.066   | 1735      | 1744     | 1775      | M         | 3382429 | 55537159 | 100.00% | 88.709% |
| 3      | 12.440   | 1804      | 1809     | 1836      | M         | 99156   | 1867702  | 3.36%   | 2.983%  |

<sup>1</sup>H NMR at 40 min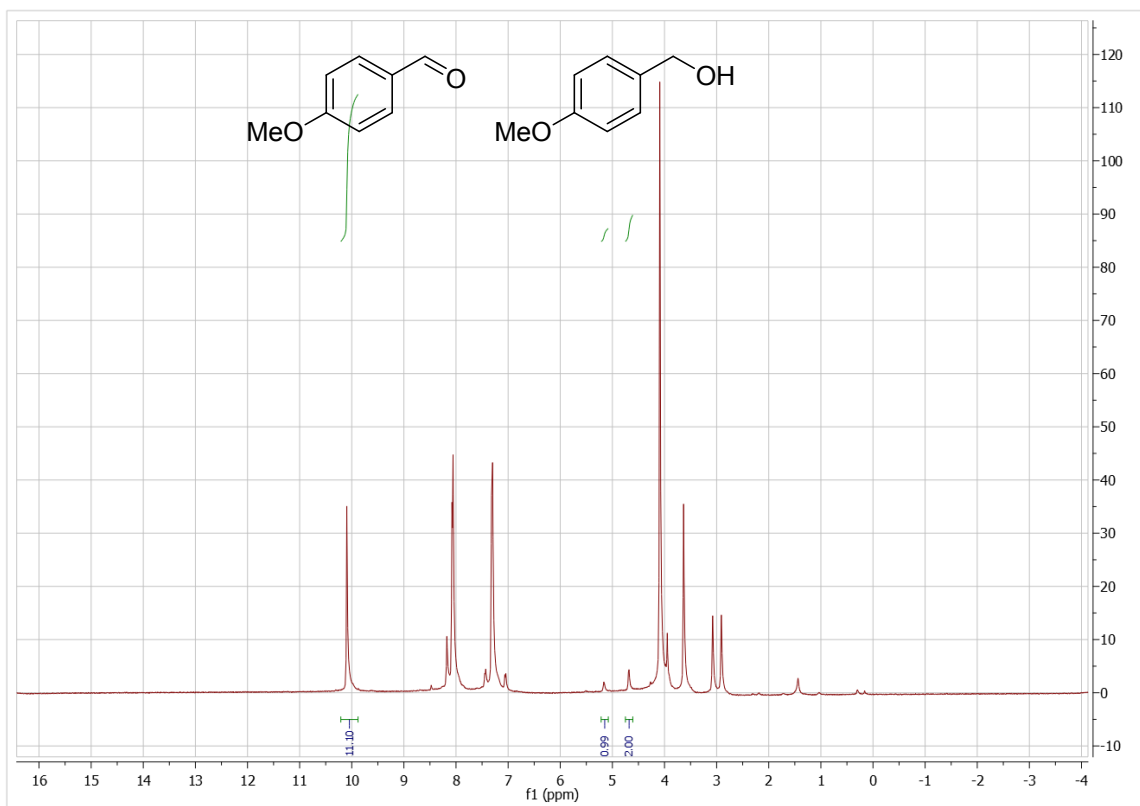

## GC-MS at 60 min

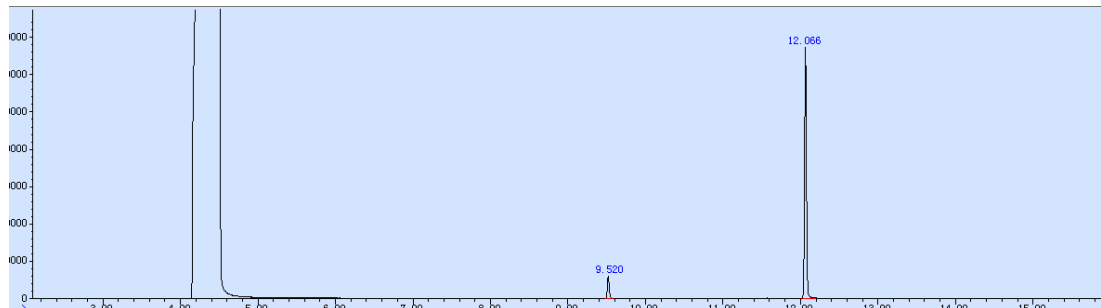

| Peak # | R.T. min | Ini. Scan | TOP Scan | Stp. Scan | Peak Type | Height  | Area     | %       | % area  |
|--------|----------|-----------|----------|-----------|-----------|---------|----------|---------|---------|
| 1      | 9.520    | 1294      | 1299     | 1309      | M         | 301825  | 4607792  | 8.41%   | 7.757%  |
| 2      | 12.066   | 1737      | 1744     | 1769      | M         | 3370816 | 54793557 | 100.00% | 92.243% |

<sup>1</sup>H NMR at 60 min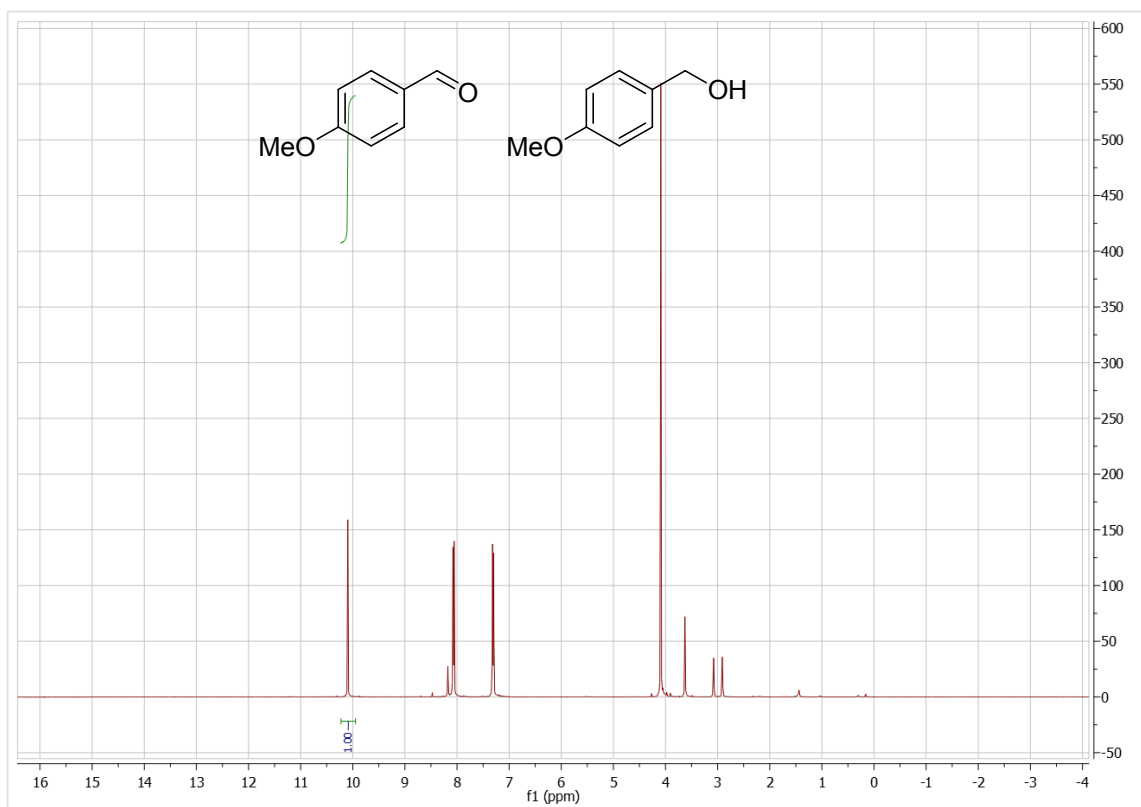

Table 3, entry 3

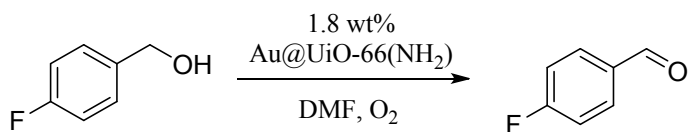

GC-MS at 0 h

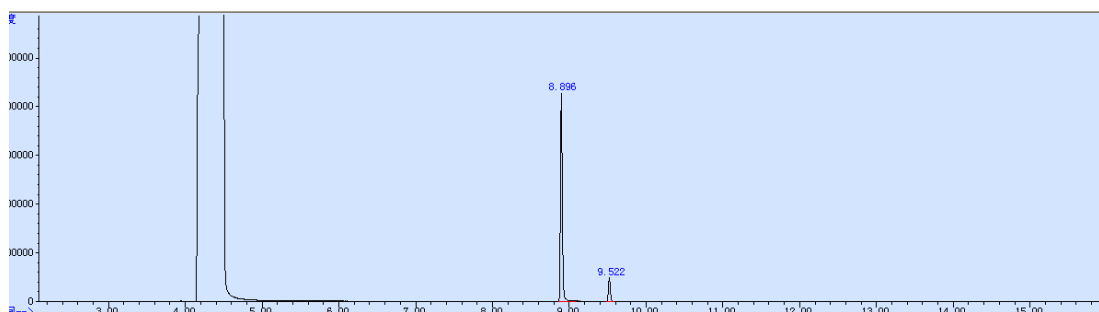

| Peak # | R.T. min | Ini. Scan | TOP Scan | Stp. Scan | Peak Type | Height  | Area     | %       | % area  |
|--------|----------|-----------|----------|-----------|-----------|---------|----------|---------|---------|
| 1      | 8.896    | 1185      | 1190     | 1227      | M         | 2138599 | 34206279 | 100.00% | 89.981% |
| 2      | 9.522    | 1293      | 1299     | 1311      | M         | 249018  | 3808757  | 11.13%  | 10.019% |

## GC-MS at 2 h

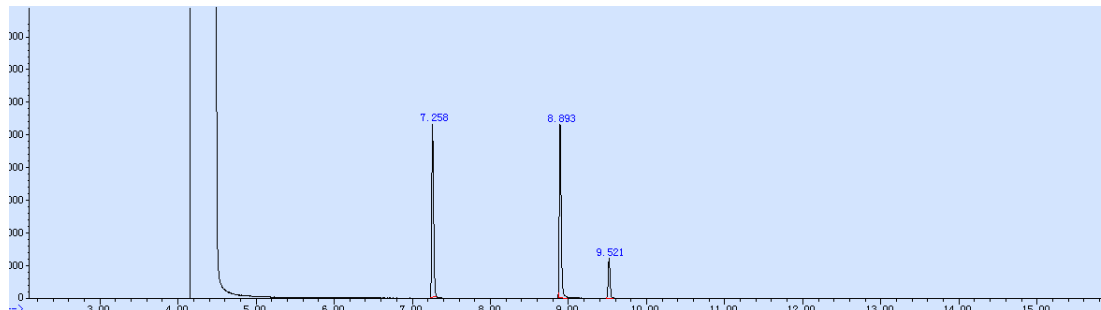

| Peak # | R.T. min | Ini. Scan | TOP Scan | Stp. Scan | Peak Type | Height  | Area     | %       | % area  |
|--------|----------|-----------|----------|-----------|-----------|---------|----------|---------|---------|
| 1      | 7.258    | 899       | 904      | 912       | M         | 1064574 | 16435718 | 95.15%  | 43.712% |
| 2      | 8.893    | 1186      | 1189     | 1206      | M         | 1100531 | 17273744 | 100.00% | 45.940% |
| 3      | 9.521    | 1294      | 1299     | 1309      | M         | 246024  | 3890891  | 22.52%  | 10.348% |

<sup>1</sup>H NMR at 2 h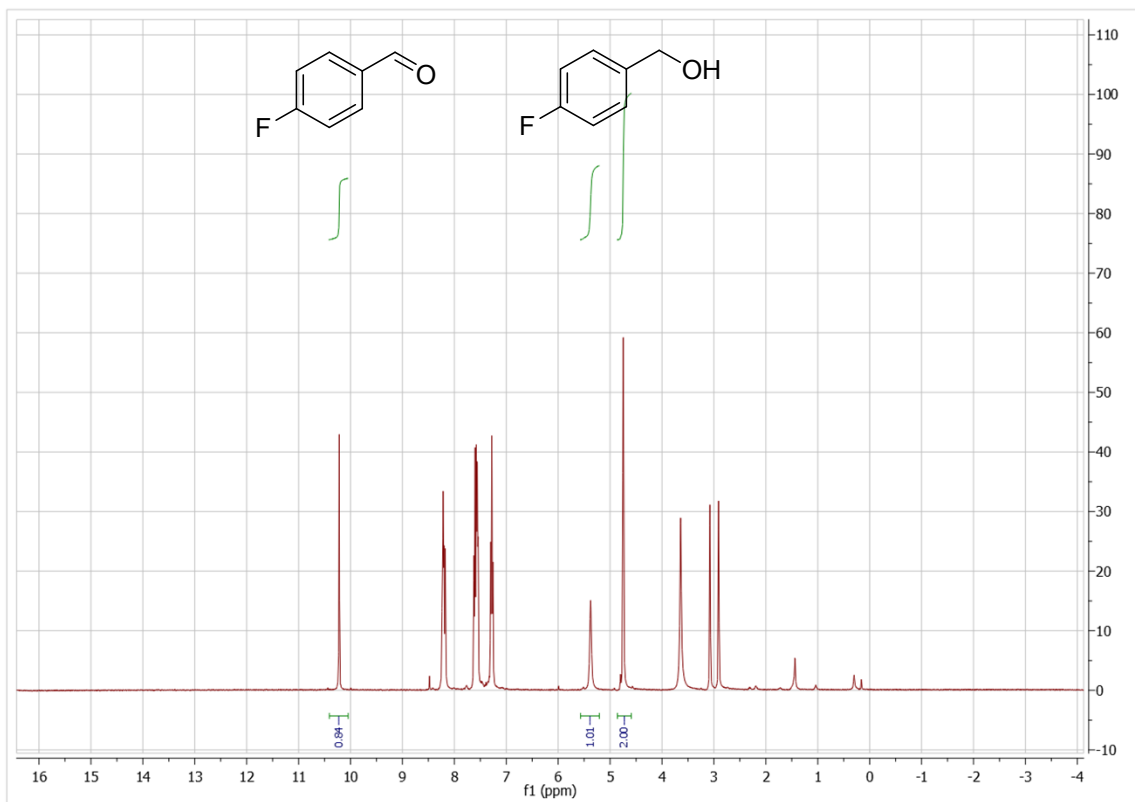

## GC-MS at 4 h

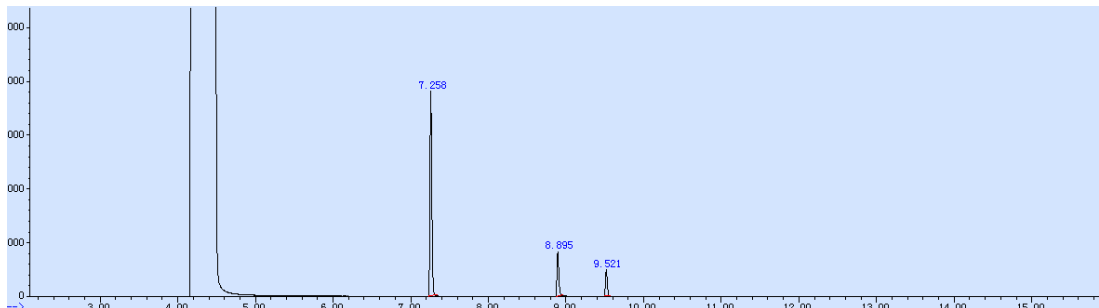

| Peak # | R.T. min | Ini. Scan | TOP Scan | Stp. Scan | Peak Type | Peak Height | Area     | %       | % area  |
|--------|----------|-----------|----------|-----------|-----------|-------------|----------|---------|---------|
| 1      | 7.258    | 898       | 904      | 918       | M         | 1927979     | 29717153 | 100.00% | 74.738% |
| 2      | 8.895    | 1185      | 1190     | 1200      | M         | 415092      | 6407205  | 21.56%  | 16.114% |
| 3      | 9.521    | 1295      | 1299     | 1307      | M         | 244450      | 3637198  | 12.24%  | 9.148%  |

 $^1\text{H}$  NMR at 4 h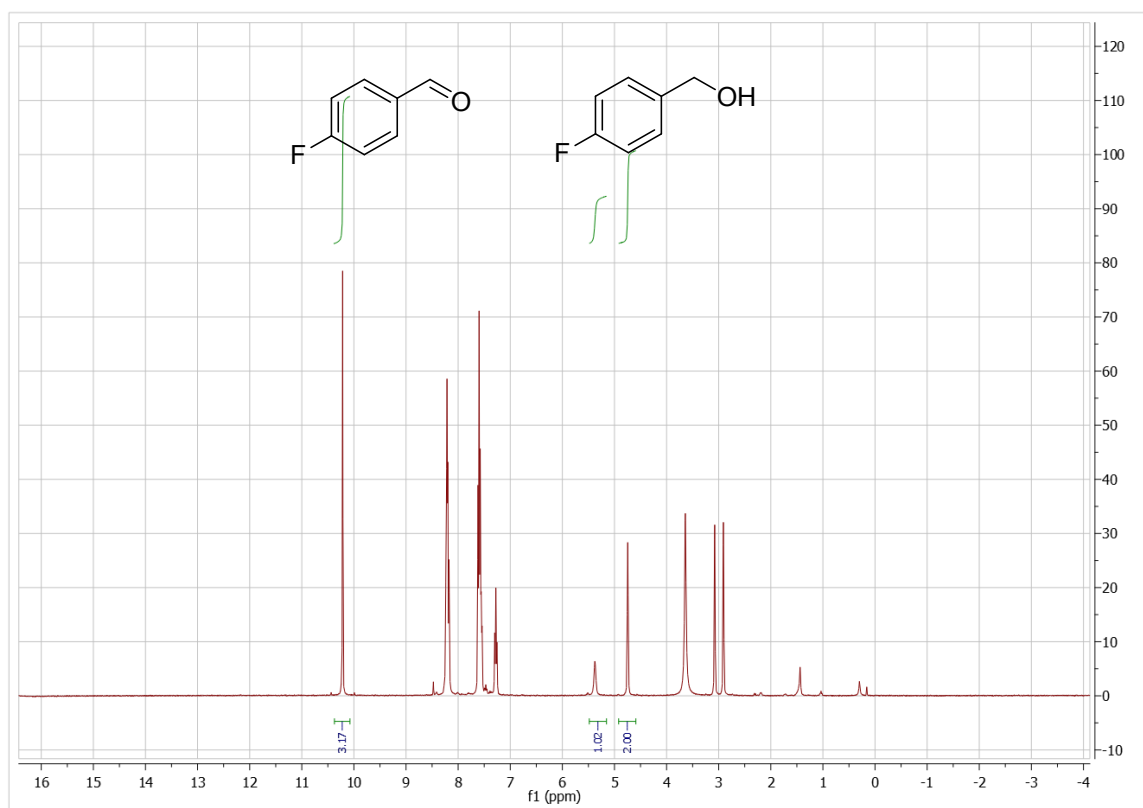

## GC-MS at 6 h

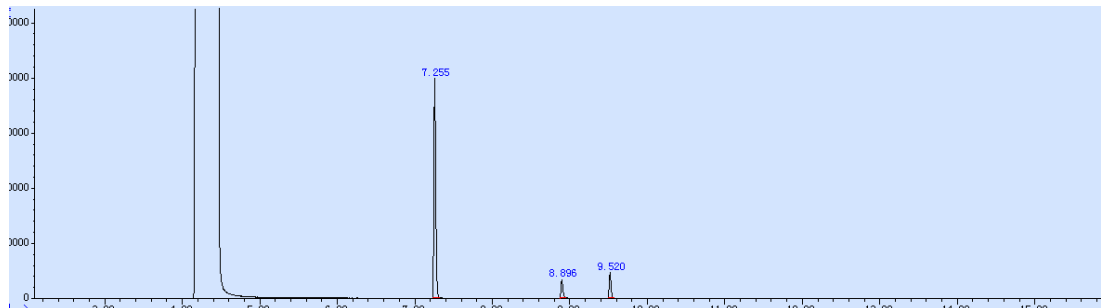

| Peak # | R.T. min | Ini. Scan | TOP Scan | Stp. Scan | Peak Type | Peak Height | Area     | %       | % area  |
|--------|----------|-----------|----------|-----------|-----------|-------------|----------|---------|---------|
| 1      | 7.255    | 899       | 903      | 916       | M         | 2016669     | 31045347 | 100.00% | 84.090% |
| 2      | 8.896    | 1186      | 1190     | 1201      | M2        | 162510      | 2557408  | 8.24%   | 6.927%  |
| 3      | 9.520    | 1295      | 1299     | 1308      | M         | 225876      | 3316271  | 10.68%  | 8.983%  |

 $^1\text{H}$  NMR at 6 h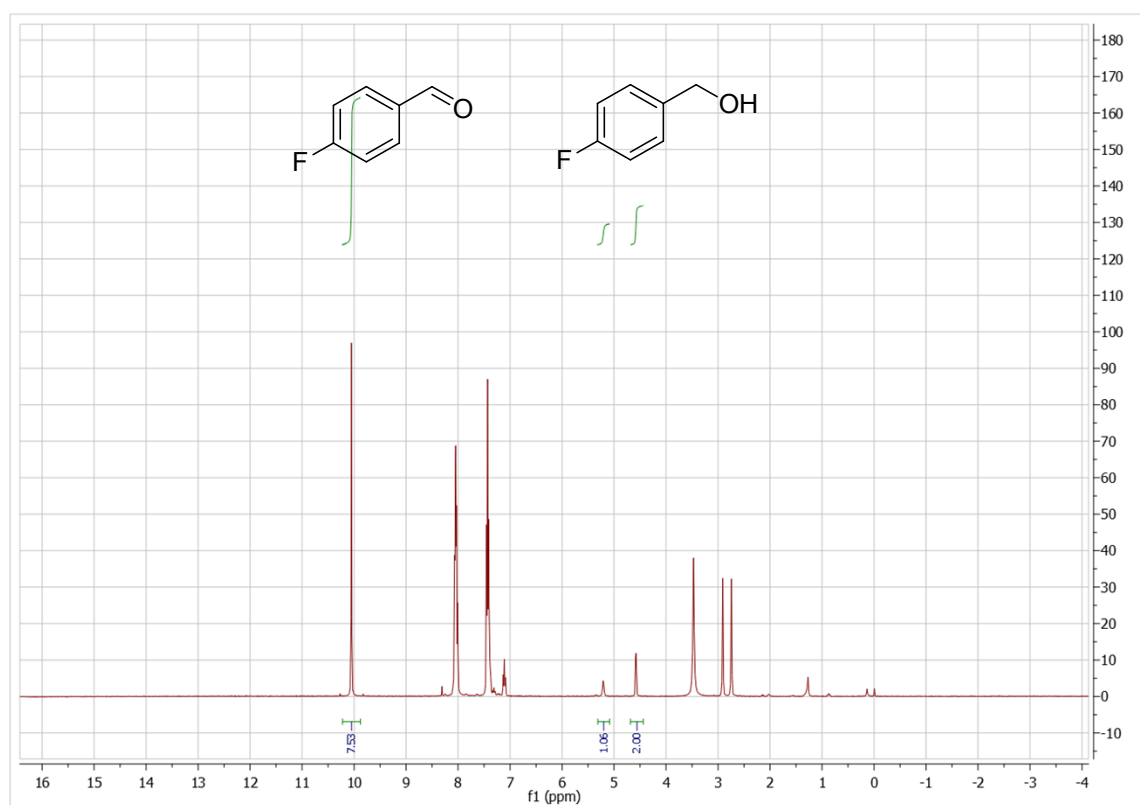



Table 3, entry 4

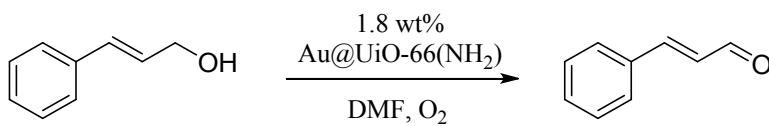

GC-MS at 0 min

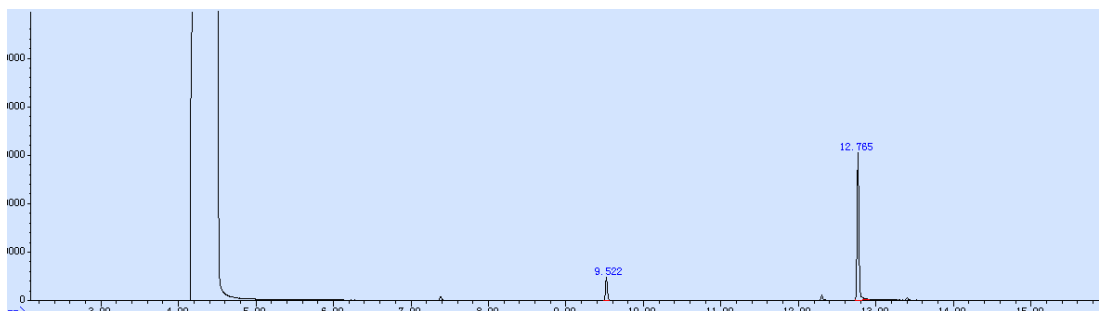

| Peak # | R.T. min | Ini. Scan | TOP Scan | Stp. Scan | Peak Type | Height  | Area     | %       | % area  |
|--------|----------|-----------|----------|-----------|-----------|---------|----------|---------|---------|
| 1      | 9.522    | 1294      | 1299     | 1305      | M         | 244250  | 3749702  | 15.30%  | 13.273% |
| 2      | 12.766   | 1861      | 1866     | 1894      | M         | 1538590 | 24500995 | 100.00% | 86.727% |

## GC-MS at 20 min

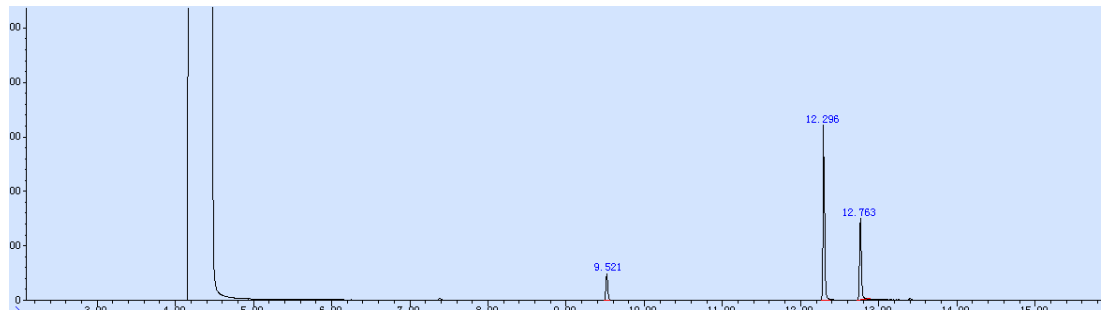

| Peak # | R.T. min | Ini. Scan | TOP Scan | Stp. Scan | Peak Type | Height  | Area     | %       | % area  |
|--------|----------|-----------|----------|-----------|-----------|---------|----------|---------|---------|
| 1      | 9.521    | 1294      | 1299     | 1306      | M         | 247451  | 3847271  | 14.87%  | 9.268%  |
| 2      | 12.296   | 1778      | 1784     | 1798      | M         | 1621320 | 25864479 | 100.00% | 62.308% |
| 3      | 12.763   | 1859      | 1866     | 1888      | M         | 753183  | 11799011 | 45.62%  | 28.424% |

 $^1\text{H}$  NMR at 20 min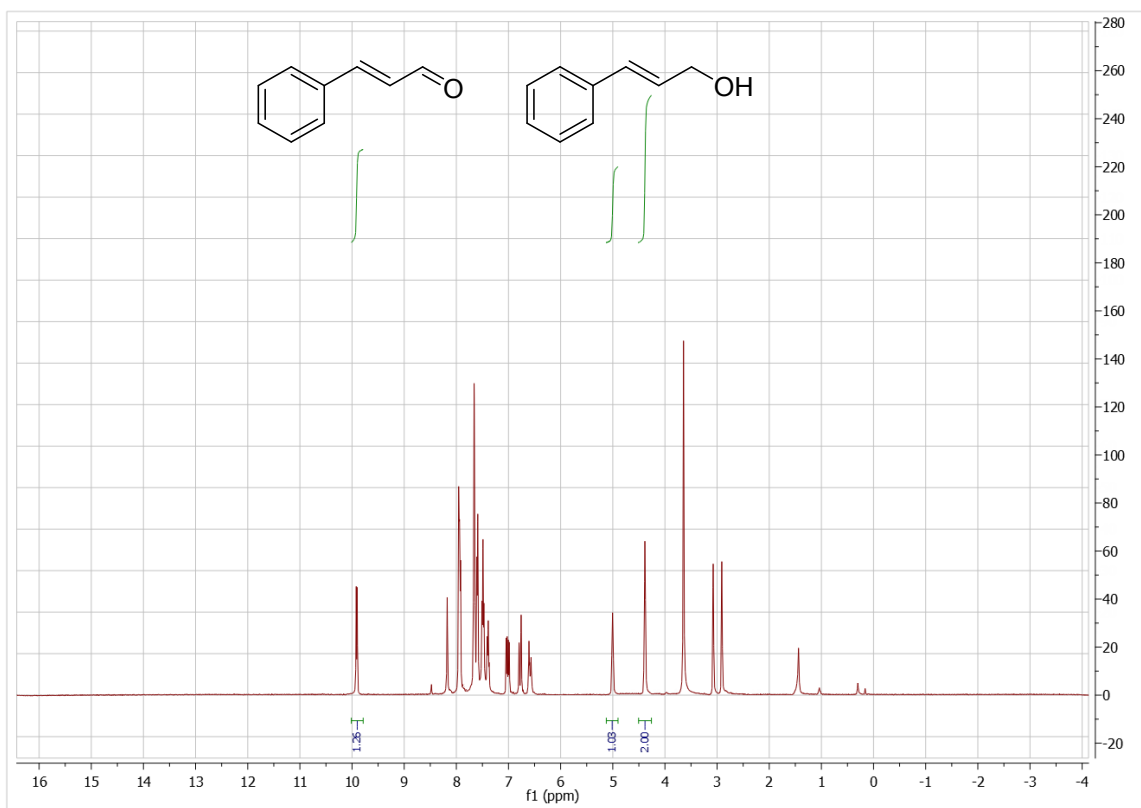

## GC-MS at 40 min

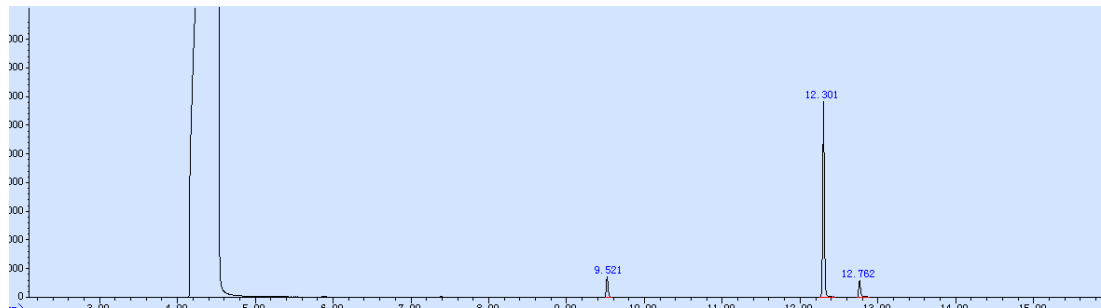

| Peak # | R.T. min | Ini. Scan | TOP Scan | Stp. Scan | Peak Type | Height  | Area     | %       | % area  |
|--------|----------|-----------|----------|-----------|-----------|---------|----------|---------|---------|
| 1      | 9.521    | 1295      | 1299     | 1312      | M         | 366038  | 5754978  | 10.17%  | 8.537%  |
| 2      | 12.301   | 1776      | 1785     | 1812      | M         | 3413211 | 56569689 | 100.00% | 83.913% |
| 3      | 12.762   | 1860      | 1866     | 1890      | M         | 296222  | 5089806  | 9.00%   | 7.550%  |

 $^1\text{H}$  NMR at 40 min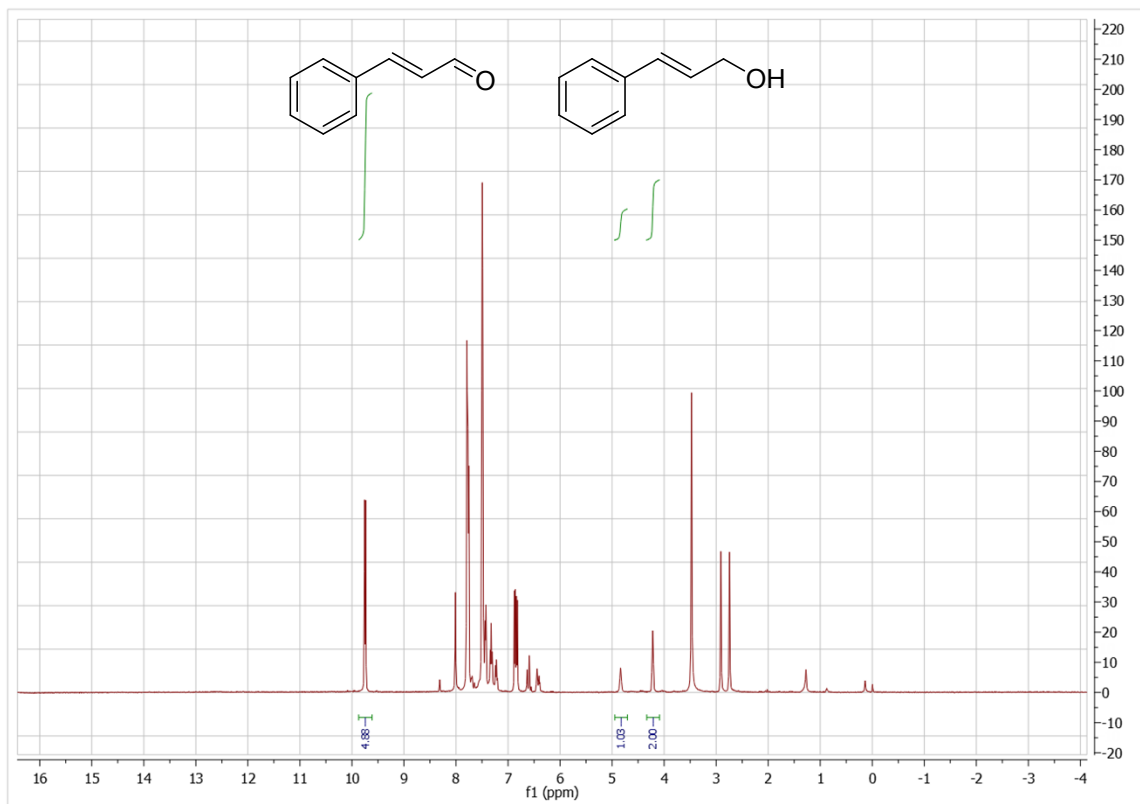

## GC-MS at 60 min

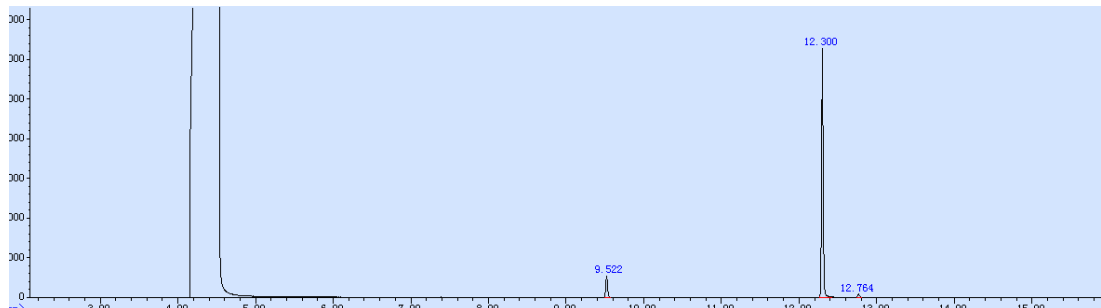

| Peak # | R.T. min | Ini. Scan | TOP Scan | Stp. Scan | Peak Type | Height  | Area     | %       | % area  |
|--------|----------|-----------|----------|-----------|-----------|---------|----------|---------|---------|
| 1      | 9.522    | 1294      | 1299     | 1311      | M         | 278893  | 4224710  | 8.27%   | 7.545%  |
| 2      | 12.300   | 1779      | 1785     | 1806      | M         | 3136942 | 51083523 | 100.00% | 91.229% |
| 3      | 12.764   | 1862      | 1866     | 1873      | M2        | 41453   | 686521   | 1.34%   | 1.226%  |

 $^1\text{H}$  NMR at 60 min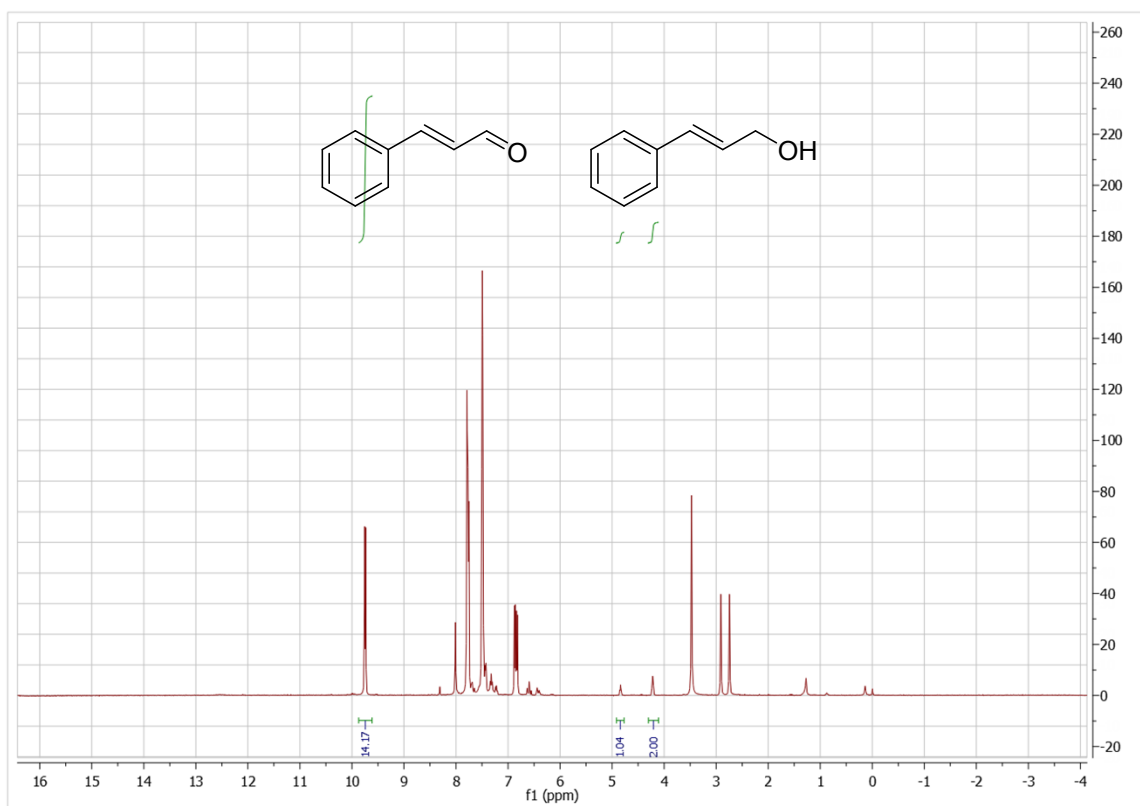

Table 3, entry 5

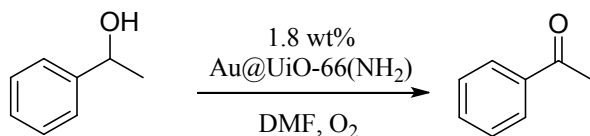

GC-MS at 0 min

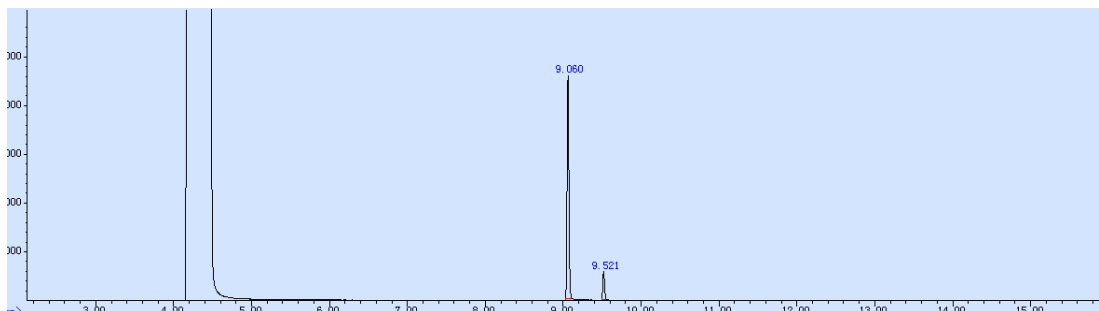

| Peak # | R.T. min | Ini. Scan | TOP Scan | Stp. Scan | Peak Type | Height  | Area     | %       | % area  |
|--------|----------|-----------|----------|-----------|-----------|---------|----------|---------|---------|
| 1      | 9.060    | 1213      | 1219     | 1229      | M         | 2335862 | 35392009 | 100.00% | 88.854% |
| 2      | 9.521    | 1295      | 1299     | 1305      | M         | 289328  | 4439595  | 12.54%  | 11.146% |

## GC-MS at 20 min

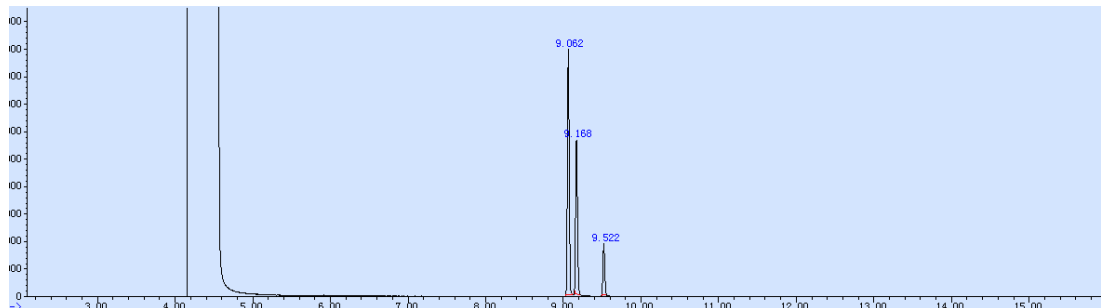

| Peak # | R.T. min | Ini. Scan | TOP Scan | Stp. Scan | Peak Type | Peak Height | Area     | %       | % area  |
|--------|----------|-----------|----------|-----------|-----------|-------------|----------|---------|---------|
| 1      | 9.062    | 1214      | 1219     | 1227      | M         | 1787123     | 27687799 | 100.00% | 53.687% |
| 2      | 9.168    | 1233      | 1238     | 1245      | M         | 1148264     | 18195177 | 65.72%  | 35.281% |
| 3      | 9.522    | 1294      | 1299     | 1306      | M         | 379622      | 5689528  | 20.55%  | 11.032% |

 $^1\text{H}$  NMR at 20 min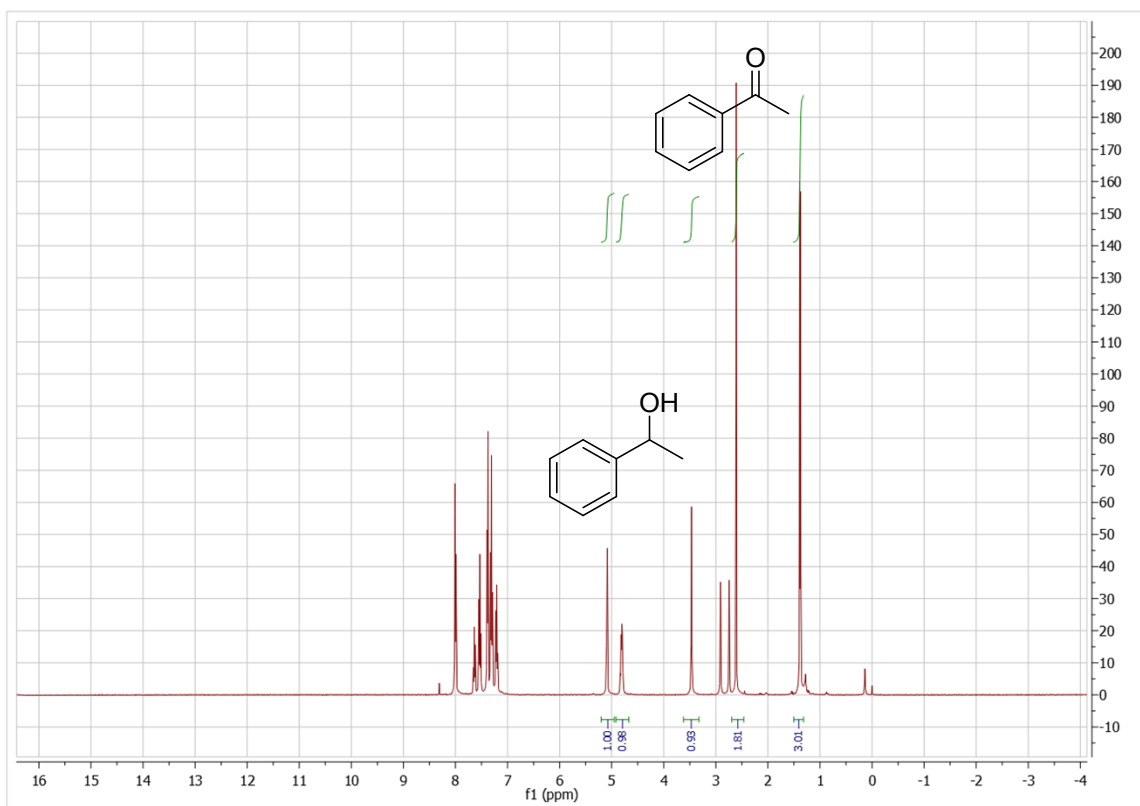

## GC-MS at 40 min

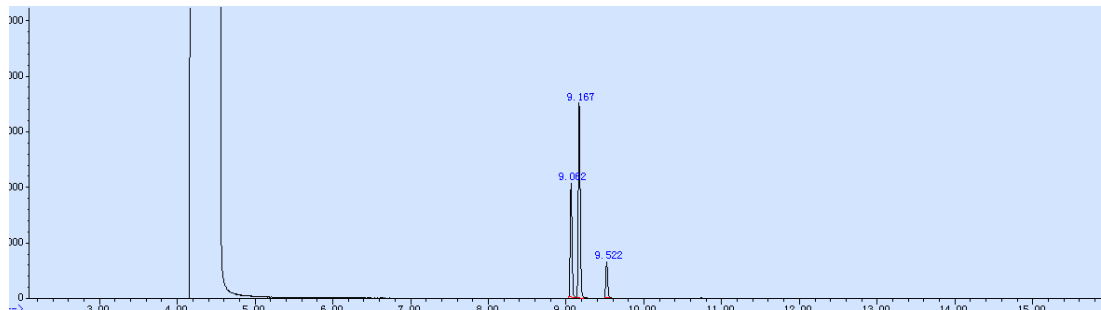

| Peak # | R.T. min | Ini. Scan | TOP Scan | Stp. Scan | Peak Type | Peak Height | Area     | %       | % area  |
|--------|----------|-----------|----------|-----------|-----------|-------------|----------|---------|---------|
| 1      | 9.062    | 1214      | 1219     | 1227      | M         | 1027226     | 15920609 | 56.17%  | 32.236% |
| 2      | 9.167    | 1232      | 1237     | 1246      | M         | 1792650     | 28344888 | 100.00% | 57.393% |
| 3      | 9.522    | 1294      | 1299     | 1308      | M         | 333241      | 5121751  | 18.07%  | 10.371% |

 $^1\text{H}$  NMR at 40 min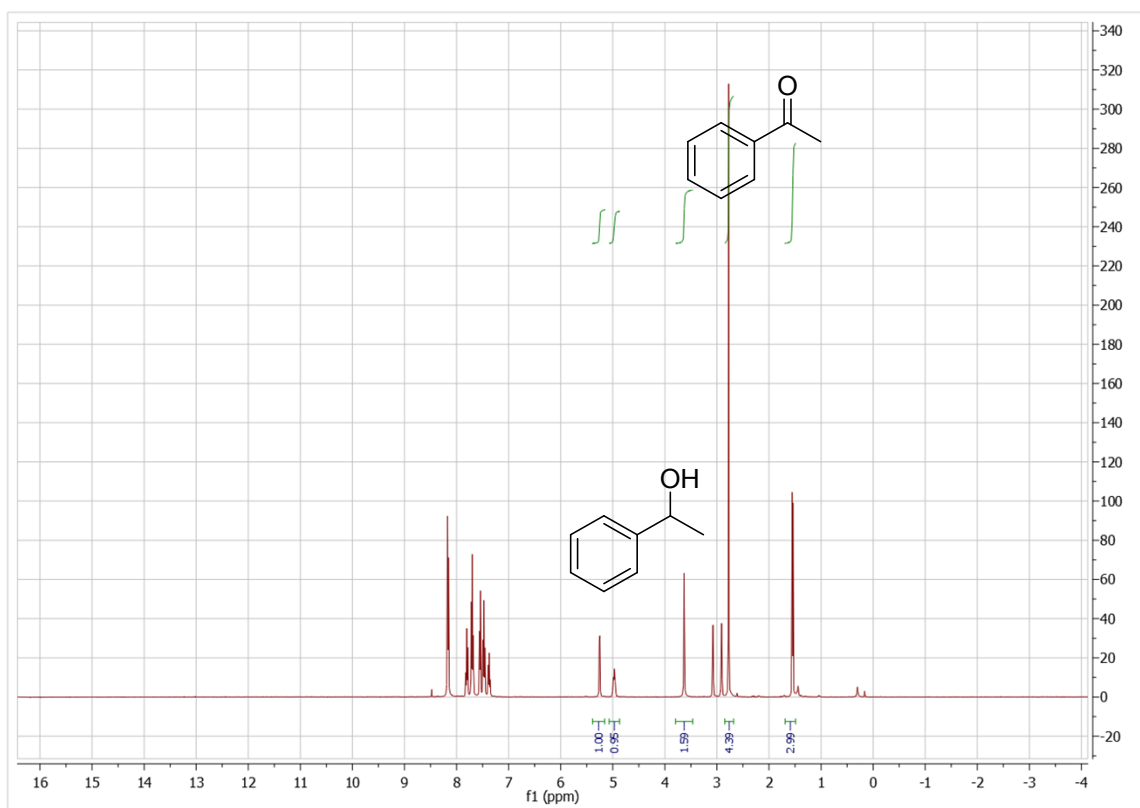

## GC-MS at 60 min

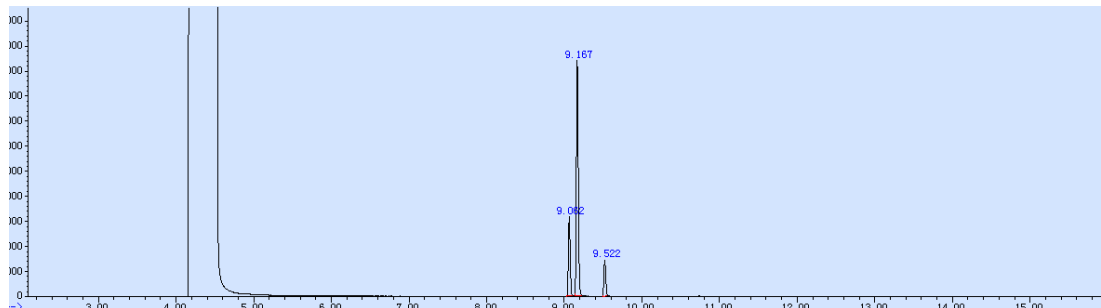

| Peak # | R.T. min | Ini. Scan | TOP Scan | Stp. Scan | Peak Type | Height  | Area     | %       | % area  |
|--------|----------|-----------|----------|-----------|-----------|---------|----------|---------|---------|
| 1      | 9.062    | 1214      | 1219     | 1226      | M         | 629345  | 9572670  | 31.65%  | 21.506% |
| 2      | 9.167    | 1232      | 1237     | 1247      | M         | 1904920 | 30241199 | 100.00% | 67.941% |
| 3      | 9.522    | 1295      | 1299     | 1306      | M         | 299303  | 4696915  | 15.53%  | 10.552% |

 $^1\text{H}$  NMR at 60 min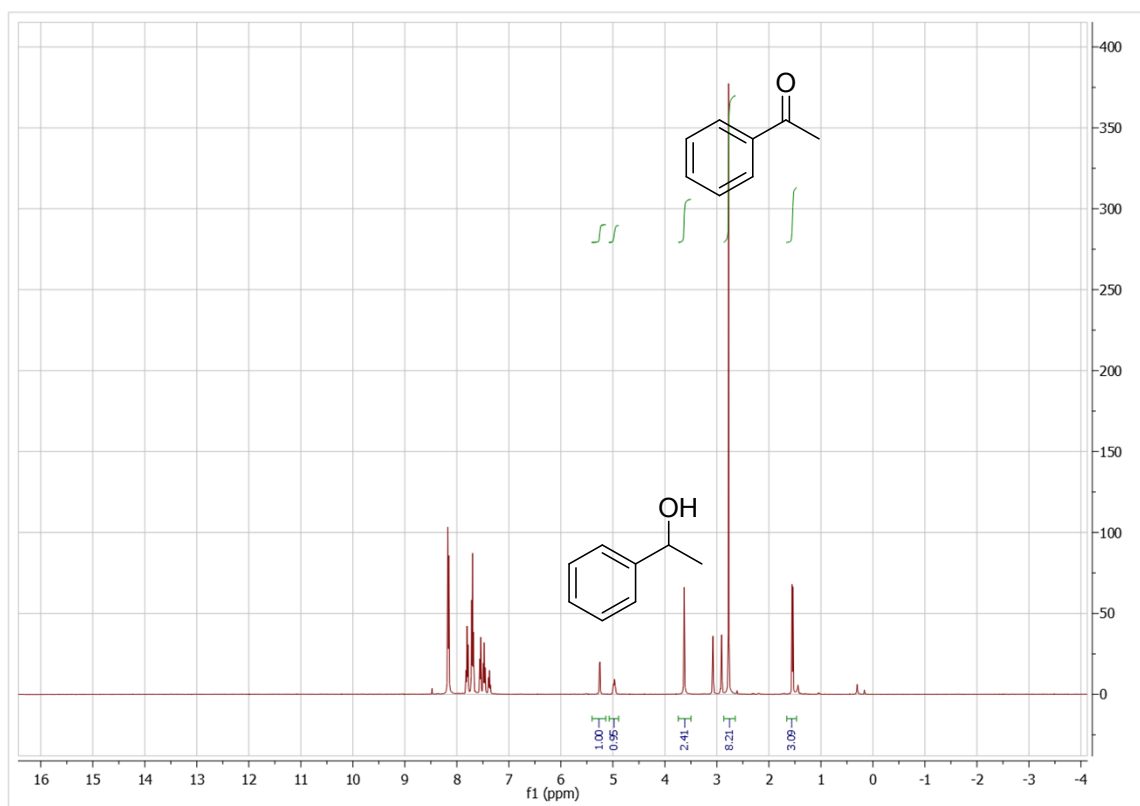



The isolated yield determination for aerobic oxidation of alcohol

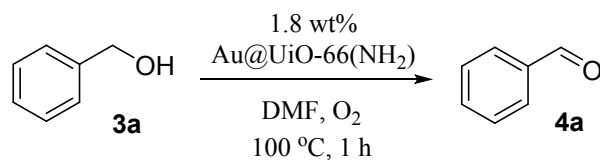

The reaction was run in a 25 mL flask with reflux condenser. In a typical reaction, the flask was first charged with desired amount of alcohol, DMF solvent and  $\text{Au@UiO-66(NH}_2\text{)}$  catalyst. After purging three times with oxygen and set up with the oxygen balloon, the closed vessel was heated rapidly to reach  $100\text{ }^\circ\text{C}$ . After 1 h, the flask was cooled to room temperature. The reaction was purified without work-up by flash chromatography over silica gel column (2% EtOAc in hexanes) to afford the aldehyde product **4a** as a clear oil (96.5 mg, 91% yield). Analytical thin layer chromatography was performed using EMD 0.25 mm silica gel 60-F plates. Flash column chromatography was performed on Sorbent Technologies 60 Å silica gel.
